# Supplementary material for: Quantifying GC-biased gene conversion in great ape genomes using polymorphism-aware models
Source: bioRxiv or medRxiv preprint supplement (doi:10.1101/380246), 2019-03-20
Supplement: Supplementary file [file 380246-1.pdf]

## Supplementary material

547

### Quantifying GC-biased gene conversion in great ape genomes using polymorphism-aware models

548

549

Rui Borges<sup>1</sup>, Gergely Szöllősi<sup>2</sup>, and Carolin Kosiol<sup>3\*</sup>

550

1. Institute of Population Genetics, Vetmeduni Vienna, Veterinärplatz 1, 1210 Wien, Austria

551

2. Department of Biological Physics, ELTE-MTA "Lendulet" Biophysics Research Group,  
Eötvös University, Pázmány P. stny. 1A, Budapest H-1117, Hungary.

552

553

3. Centre for Biological Diversity, University of St Andrews, St Andrews, Fife KY16 9TH, UK

554

\* corresponding author: ck202@st-andrews.ac.uk

555

**Supplementary File S1. Proof of the stationary vector**

556

Let  $\psi$  be a stationary vector of  $\mathbf{q}$  and  $\psi_{ij}^n$  be the element of the stationary vector

557

corresponding to the state  $\{ni, (N - n)j\}$ . In the multivariate Moran model with low mutation

558

rates and selection, mutation is only acting in the boundary states, permitting the

559

monomorphic states to communicate with the polymorphic states, while drift and selection are

560

both acting among the polymorphic states. The detailed balance conditions lead to equations

561

for the monomorphic and the polymorphic states. In the boundary states, an allele  $i$  is either

562

fixed ( $n = N$ ) or absent ( $n = 0$ , i.e.  $j$  is fixed):

563

$$\psi_i q_{ij}^{N \rightarrow N-1} = \psi_{ij}^{N-1} q_{ij}^{N-1 \rightarrow N} \quad \psi_j q_{ij}^{0 \rightarrow 1} = \psi_{ij}^1 q_{ij}^{1 \rightarrow 0} \quad (8)$$

Between the polymorphic states, the general condition is valid:

564

$$\psi_{ij}^n q_{ij}^{n \rightarrow n+1} = \psi_{ij}^{n+1} q_{ij}^{n+1 \rightarrow n} \quad (9)$$

Condition (9) can be rewritten in the recursive form:

565

$$\psi_{ij}^{n+1} = \psi_{ij}^n \frac{q_{ij}^{n \rightarrow n+1}}{q_{ij}^{n+1 \rightarrow n}} \quad (10)$$

Equations (8) and (10) can be combined:

566

$$\psi_i q_{ij}^{N \rightarrow N-1} = \psi_{ij}^n \frac{q_{ij}^{n \rightarrow n+1}}{q_{ij}^{n+1 \rightarrow n}} \cdots \frac{q_{ij}^{N-2 \rightarrow N-1}}{q_{ij}^{N-1 \rightarrow N-2}} q_{ij}^{N-1 \rightarrow N} = \psi_{ij}^n q_{ij}^{n \rightarrow n+1} \prod_{r=n+1}^{N-1} \frac{q_{ij}^{r \rightarrow r+1}}{q_{ij}^{r \rightarrow r-1}} \quad (11)$$

Recognizing that  $q_{ij}^{N \rightarrow N-1} = \mu_{ij} = \pi_j \rho_{ij}$  and that all the rates inside the product follow

567

expression 2, we can further simplify equation (10) in order to the  $\psi_{ij}^n$  element of the

568

stationary vector  $\mathbf{q}$ .

569

$$\psi_{ij}^n = \frac{\psi_i \pi_j \rho_{ij}}{q_{ij}^{n \rightarrow n+1}} \left( \frac{1 + \sigma_j}{1 + \sigma_i} \right)^{N-n-1} \quad (12)$$

We can now use equation (12) and make  $n = 0$ . Because  $\psi_{ij}^0 = \psi_j$  and  $q_{ij}^{0 \rightarrow 1} = \mu_{ji} = \pi_i \rho_{ij}$ , we

570

obtain a possible solution for the monomorphic states of the stationary distribution:

571

$$\frac{\psi_j}{\psi_i} = \frac{\pi_j}{\pi_i} \left( \frac{1 + \sigma_j}{1 + \sigma_i} \right)^{N-1} \quad (13)$$

And for the polymorphic states, we use equation (12):

572

$$\psi_{ij}^n = \pi_i \pi_j \rho_{ij} (1 + \sigma_i)^{n-1} (1 + \sigma_j)^{N-n-1} \frac{N}{n(N-n)} \quad (14)$$

The stationary distribution obtained here can be used to obtain the stationary vector of the

573

boundary multivariate Moran model in neutrality. We observe that when  $\boldsymbol{\sigma} = \mathbf{0}$ , we obtain the

574

solution obtained by Schrepf et al. (2016) for the multivariate Moran model with drift only.

575

$$\psi_i = \pi_i \quad \psi_{ij}^n = \pi_i \pi_j \rho_{ij} \frac{N}{n(N-n)} \quad (15)$$

**References:**

- Schrenpf, D., Minh, B. Q., De Maio, N., von Haeseler, A., & Kosiol, C. (2016). Reversible polymorphism-aware phylogenetic models and their application to tree inference. *Journal of Theoretical Biology*, 407, 362-370.

576

577

578

579

**Supplementary File S2. Proof of the expected number of Moran events per unit of time** 580  
581

In order to have an impression of the consequences of allelic selection in branch length estimation (or the total rate of the process), we computed the expected number of events per unit of time for the multivariate Moran model with selection: 582  
583  
584

$$d_S(t = 1) = - \sum_i \psi_i q_{ii} \quad (16)$$

Where  $\psi$  is the stationary vector and  $q_{ii}$  the diagonal elements of  $\mathbf{q}$  (expression (2)). Equation 585  
16 can be solved by observing that a monomorphic state can only be escaped by mutation, 586  
while a polymorphic state can only be escaped by selection and drift. 587

$$d_S(1) = \sum_{i \in \mathcal{A}} \sum_{j \neq i} \psi_i \mu_{ij} + \sum_{ij \in \mathcal{A}^C} \sum_{n=1}^{N-1} \psi_{ij}^n \frac{n(N-n)}{N} (1 + \sigma_i + 1 + \sigma_j) \quad (17)$$

The stationary vector is known from equations (13) and (14).  $k$  is the normalization constant 588  
defined in 4. 589

$$d_S(1) = \frac{1}{k} \sum_{i \in \mathcal{A}} \sum_{j \neq i} (1 + \sigma_i)^{N-1} \pi_i \rho_{ij} \pi_j + \frac{1}{k} \sum_{ij \in \mathcal{A}^C} \sum_{n=1}^{N-1} \pi_i \rho_{ij} \pi_j [(1 + \sigma_i)^n (1 + \sigma_j)^{N-n-1} + (1 + \sigma_i)^{n-1} (1 + \sigma_j)^{N-n}] \quad (18)$$

The expression can be further simplified by observing that the sum in  $n = 1, \dots, N$  results in 590  
doubling every  $(1 + \sigma_i)^{n-1} (1 + \sigma_j)^{N-n}$  element. Therefore, the expected number of events can 591  
be simplified to: 592

$$d_S(1) = \frac{2}{k} \sum_{ij \in \mathcal{A}^C} \sum_{n=1}^N \pi_i \rho_{ij} \pi_j (1 + \sigma_i)^{n-1} (1 + \sigma_j)^{N-n} \quad (19)$$

**Supplementary File S3. Proof of the Moran distance in number substitutions**

593

The Moran distance  $d_S(t)$  accounts for several events (mutations, drift and selection) and differs from the standard distances  $d_S^*(t)$ , calculated in terms of the expected number of substitutions. A way to compare them is correcting the Moran distance so it only accounts for substitutions, which can be done by computing the probability of a substitution  $s$ .

594

595

596

597

$$d_S^*(t) = d_S(t)s \quad (20)$$

$s$  can be calculated multiplying the probability  $m$  of an event being a mutation, by the probability  $h$  of that mutation getting fixed in the population.

598

599

$$s = \sum_{ij \in \mathcal{A}^P} s_{i \rightarrow j} = \sum_{ij} m_{i \rightarrow j} \times h_{j|i} \quad (21)$$

$\mathcal{A}^P$  represents all the possible pair-wise permutations without repetition of the  $K$  alleles.

600

**1. Solving  $m_{i \rightarrow j}$**

601

The probability of an event being a mutation is simply the ratio between the rate of mutations and the total rate (i.e the rate of mutations plus the rate of drift and selection). In stationarity, the total rate  $r_T = d_S(1)$ , the expected number of events of the Moran model defined in equation (19). The rate of a  $i \rightarrow j$  mutation is the rate of escaping the monomorphic state  $\{i\}$ .

602

603

604

605

$$m_{i \rightarrow j} = \frac{r_{i \rightarrow j}}{r_T} = \frac{\pi_i \pi_j \rho_{ij} (1 + \sigma_i)^{N-1}}{2 \sum_{ij \in \mathcal{A}^C} \sum_{n=1}^N \pi_i \pi_j \rho_{ij} (1 + \sigma_i)^{n-1} (1 + \sigma_j)^{N-n}} \quad (22)$$

We can see that  $m_{i \rightarrow j}$  differs from  $m_{j \rightarrow i}$  due to the selection coefficient in the numerator.

606

**2. Solving  $h_{i|j}$**

607

According to Kluth and Baake (2013), the fixation probability of an allele with fitness  $1 + \sigma$  can be obtained for the Moran model.

608

609

$$h = \frac{(1 + \sigma)^{N-1}}{\sum_{n=0}^{N-1} (1 + \sigma)^n} \quad (23)$$

We use the multivariate Moran model, and so we have to extend the denominator of (23) to account for the different possible combinations of two selection coefficients.

610

611

$$h_{i|j} = \frac{(1 + \sigma_i)^N}{\sum_{n=1}^N (1 + \sigma_i)^n (1 + \sigma_j)^{N-n}} \quad h_{j|i} = \frac{(1 + \sigma_j)^N}{\sum_{n=1}^N (1 + \sigma_j)^n (1 + \sigma_i)^{N-n}} \quad (24)$$

We redefine the denominators in order to make them equal.

612

$$h_{i|j} = \frac{(1 + \sigma_i)^N (1 + \sigma_j)}{\sum_{n=1}^N (1 + \sigma_i)^n (1 + \sigma_j)^{N-n+1}} \quad h_{j|i} = \frac{(1 + \sigma_j)^N (1 + \sigma_i)}{\sum_{n=1}^N (1 + \sigma_j)^n (1 + \sigma_i)^{N-n+1}} \quad (25)$$

### 3. Solving $s$

613

The probability of a  $i \rightarrow j$  substitution under the multivariate Moran model with boundary mutations and selection can be computed as:

614

615

$$s_{i \rightarrow j} = m_{i \rightarrow j} \times h_{j|i} = \frac{\pi_i \pi_j \rho_{ij} (1 + \sigma_i)^N (1 + \sigma_j)^N}{2 \times \sum_{ij \in \mathcal{A}^C} \sum_{n=1}^N \pi_i \pi_j \rho_{ij} (1 + \sigma_i)^{n-1} (1 + \sigma_j)^{N-n} \times \sum_{n=1}^N (1 + \sigma_j)^n (1 + \sigma_i)^{N-n+1}} \quad (26)$$

We can see that  $s_{i \rightarrow j} = s_{j \rightarrow i}$ . The probability of an event being an substitution is defined in

616

(21).

617

$$s = \frac{1}{\sum_{ij \in \mathcal{A}^C} \sum_{n=1}^N \pi_i \pi_j \rho_{ij} (1 + \sigma_i)^{n-1} (1 + \sigma_j)^{N-n}} \sum_{ij \in \mathcal{A}^C} \frac{\pi_i \pi_j \rho_{ij} (1 + \sigma_i)^N (1 + \sigma_j)^N}{\sum_{n=1}^N (1 + \sigma_j)^n (1 + \sigma_i)^{N-n+1}} \quad (27)$$

The relationship between the Moran distance in events and substitutions can be defined based on equation (20).

618

619

$$d_S^*(t) = d_S(t) \frac{1}{\sum_{ij \in \mathcal{A}^C} \sum_{n=1}^N \pi_i \pi_j \rho_{ij} (1 + \sigma_i)^{n-1} (1 + \sigma_j)^{N-n}} \sum_{ij \in \mathcal{A}^C} \frac{\pi_i \pi_j \rho_{ij} (1 + \sigma_i)^N (1 + \sigma_j)^N}{\sum_{n=1}^N (1 + \sigma_j)^n (1 + \sigma_i)^{N-n+1}} \quad (28)$$

This quantity can be evaluated for neutral regimes: i.e.  $\sigma \rightarrow (1, 1, 1)$ . We obtain the

620

probability of a substitutions under the neutral Moran model and it matches the results of

621

Schrempf et al. (2016):

622

$$d_S^*(t) = d_S(t) \frac{1}{N^2} \quad (29)$$

### References:

623

Kluth, S., & Baake, E. (2013). The Moran model with selection: Fixation probabilities,

624

ancestral lines, and an alternative particle representation. *Theoretical Population Biology*, 90, 104-112.

625

626

Schrempf, D., Minh, B. Q., De Maio, N., von Haeseler, A., & Kosiol, C. (2016). Reversible

627

polymorphism-aware phylogenetic models and their application to tree inference. *Journal of*

628

*Theoretical Biology*, 407, 362-370.

629

Figure S1: **Numerical validation of the stationarity vector.** Estimated vectors of  $\pi$ ,  $\rho$ ,  $\sigma$  from the great apes' data were used to calculate the rate matrix  $Q$  and the probabilities for the state space at several time points (time in generations). The initial probabilities were set uniformly as  $\frac{1}{4+6(N-1)}$ , i.e. the number of states. For sake of clarity only the monomorphic states  $\{i\}$  are represented.

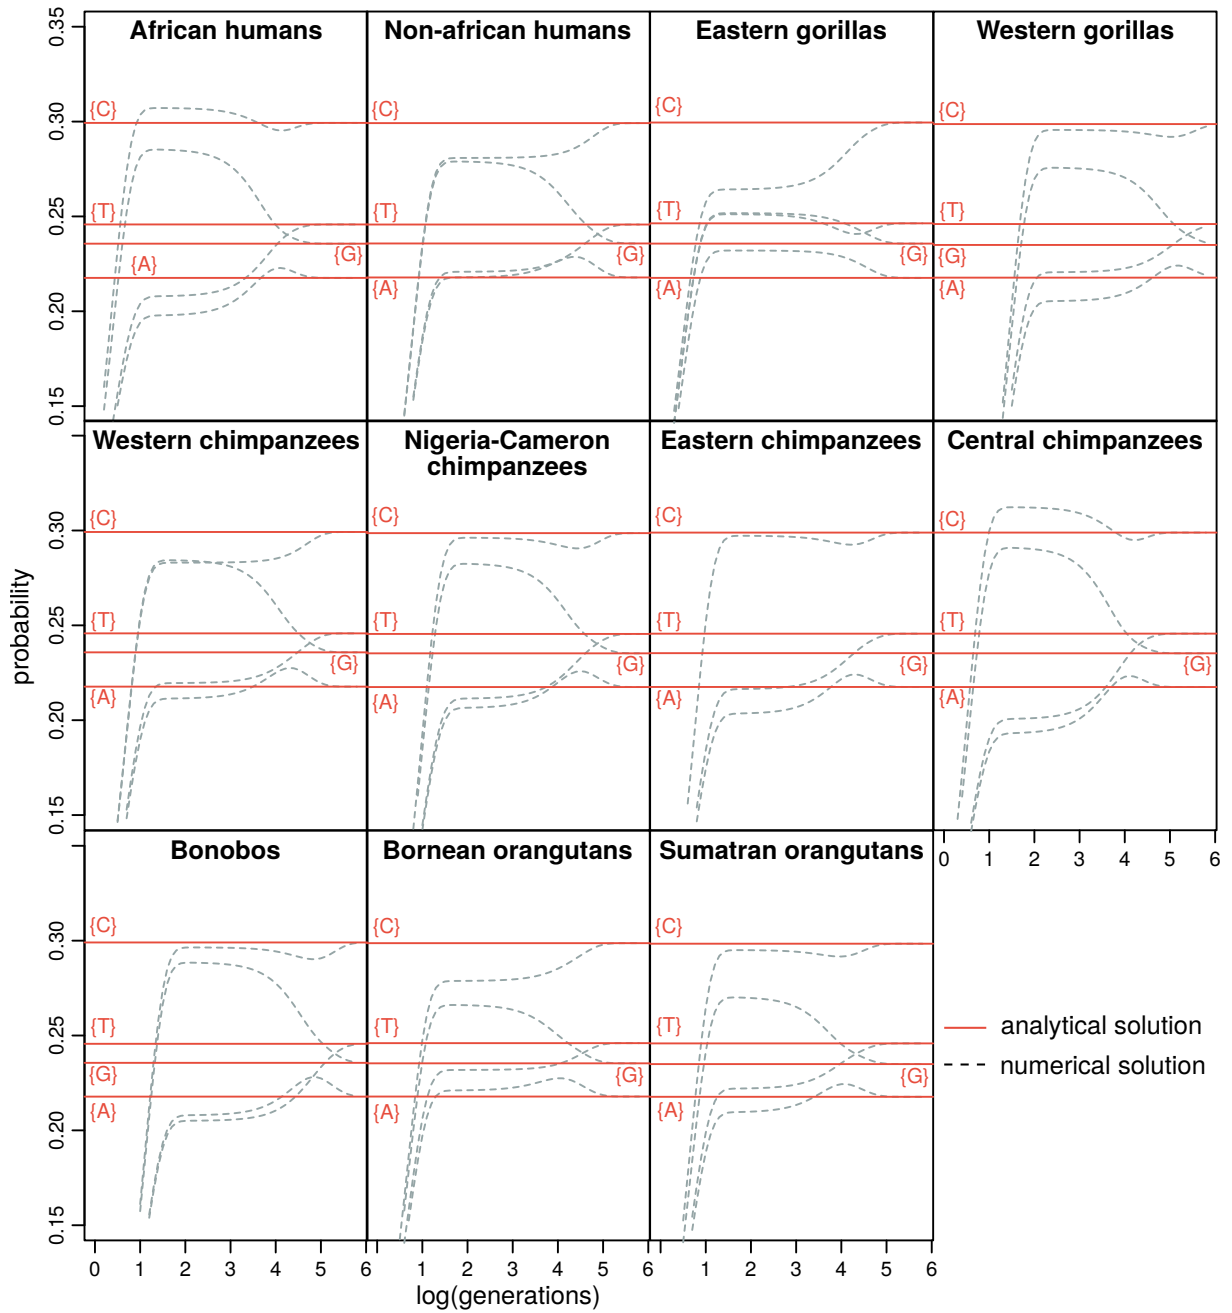

Figure S2: **Validation of the Bayesian algorithms.** Simulation conditions: 1000000 sites, 10 individuals and a simple parameter vector for the Moran model with boundary mutations:  $\boldsymbol{\pi} = (0.25, 0.25, 0.25, 0.25)$ ,  $\boldsymbol{\rho} = (0.001, 0.001, 0.001, 0.001, 0.001, 0.001)$ . The blue line represents the MCMC moving average whereas the red one represents the true values.

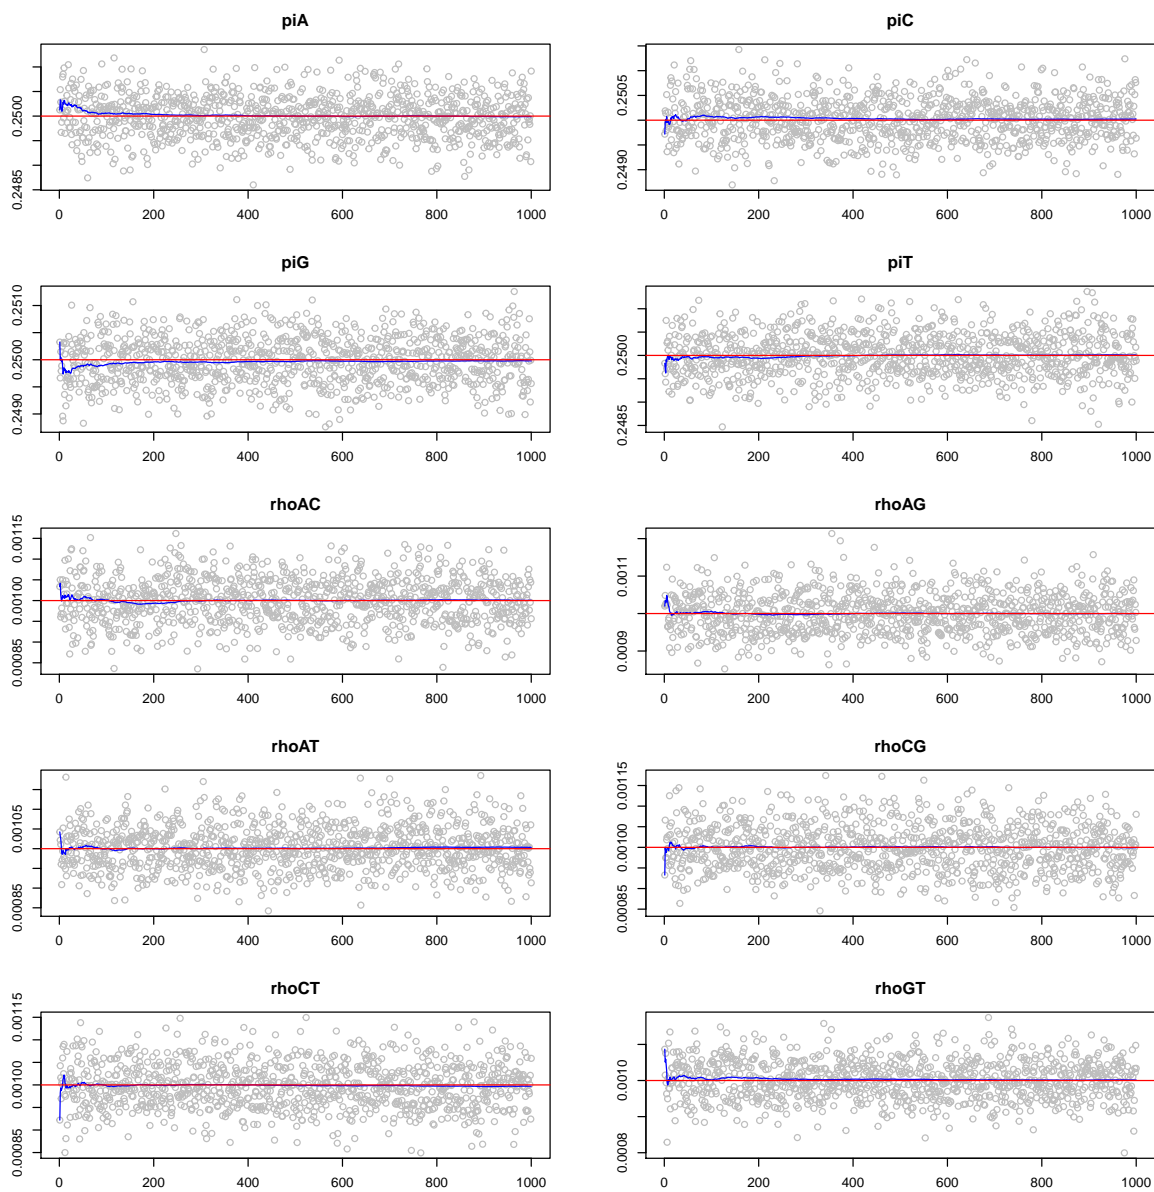



Figure S3: **Validation of the Bayesian algorithms.** Simulation conditions: 1000000 sites, 10 individuals and a complex parameter vector for the Moran model with boundary mutations:  $\boldsymbol{\pi} = (0.10, 0.20, 0.30, 0.40)$ ,  $\boldsymbol{\rho} = (0.003, 0.006, 0.009, 0.011, 0.014, 0.017)$ . The blue line represents the MCMC moving average whereas the red one represents the true values.

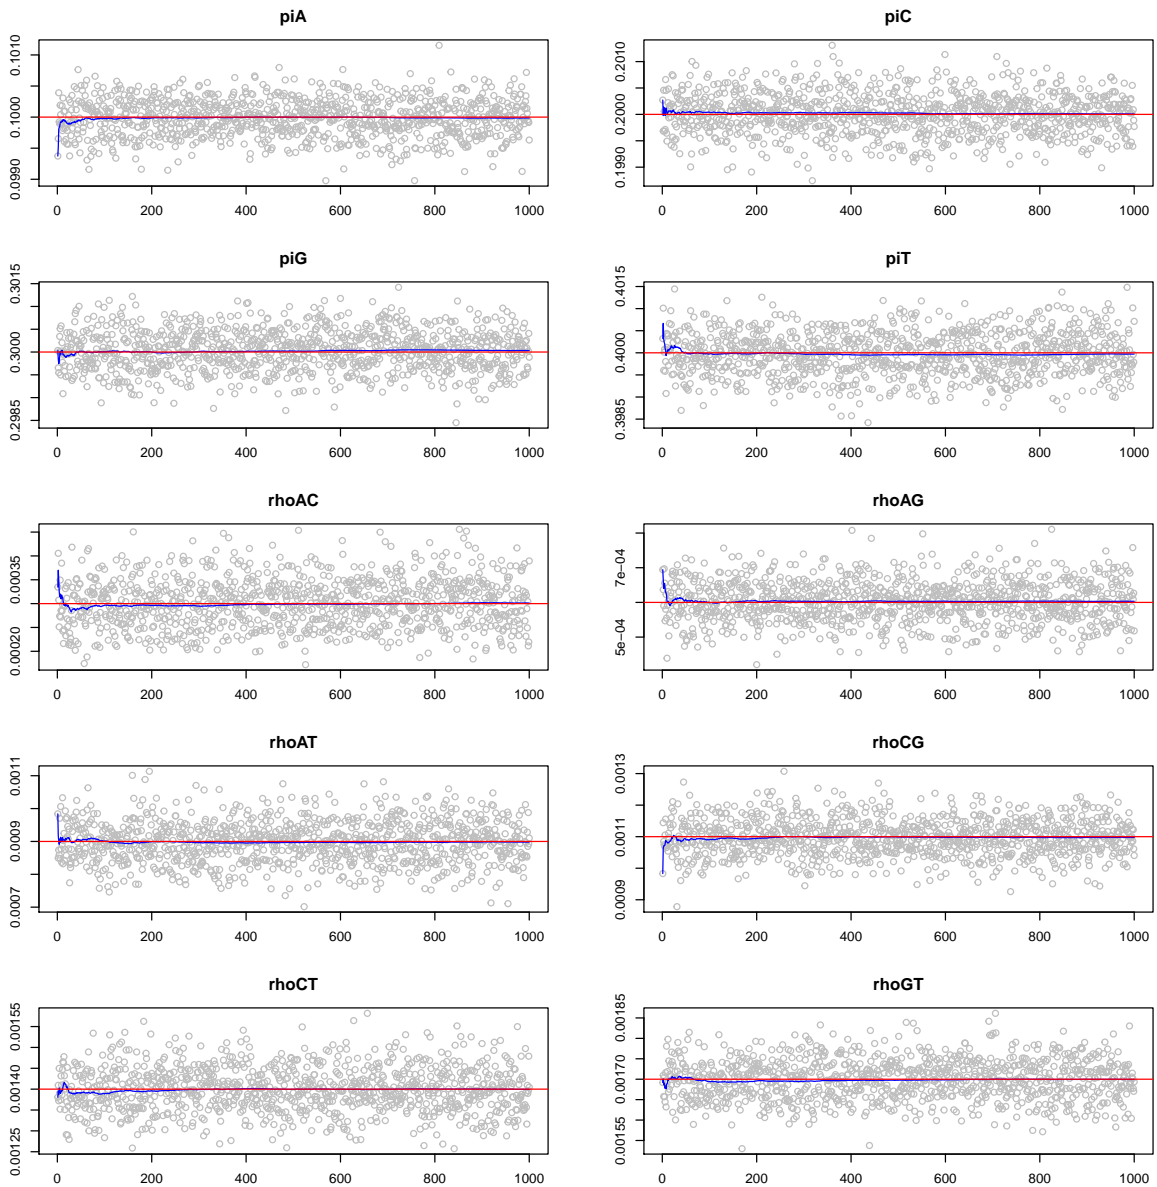

Figure S4: **Validation of the Bayesian algorithms.** Simulation conditions: 1000000 sites, 10 individuals and a simple parameter vector for the Moran model with allelic selection:  $\pi = (0.25, 0.25, 0.25, 0.25)$ ,  $\rho = (0.001, 0.001, 0.001, 0.001, 0.001, 0.001)$ ,  $\sigma = (1.00, 1.00, 1.00, 1.00)$ . The blue line represents the MCMC moving average whereas the red one represents the true values.

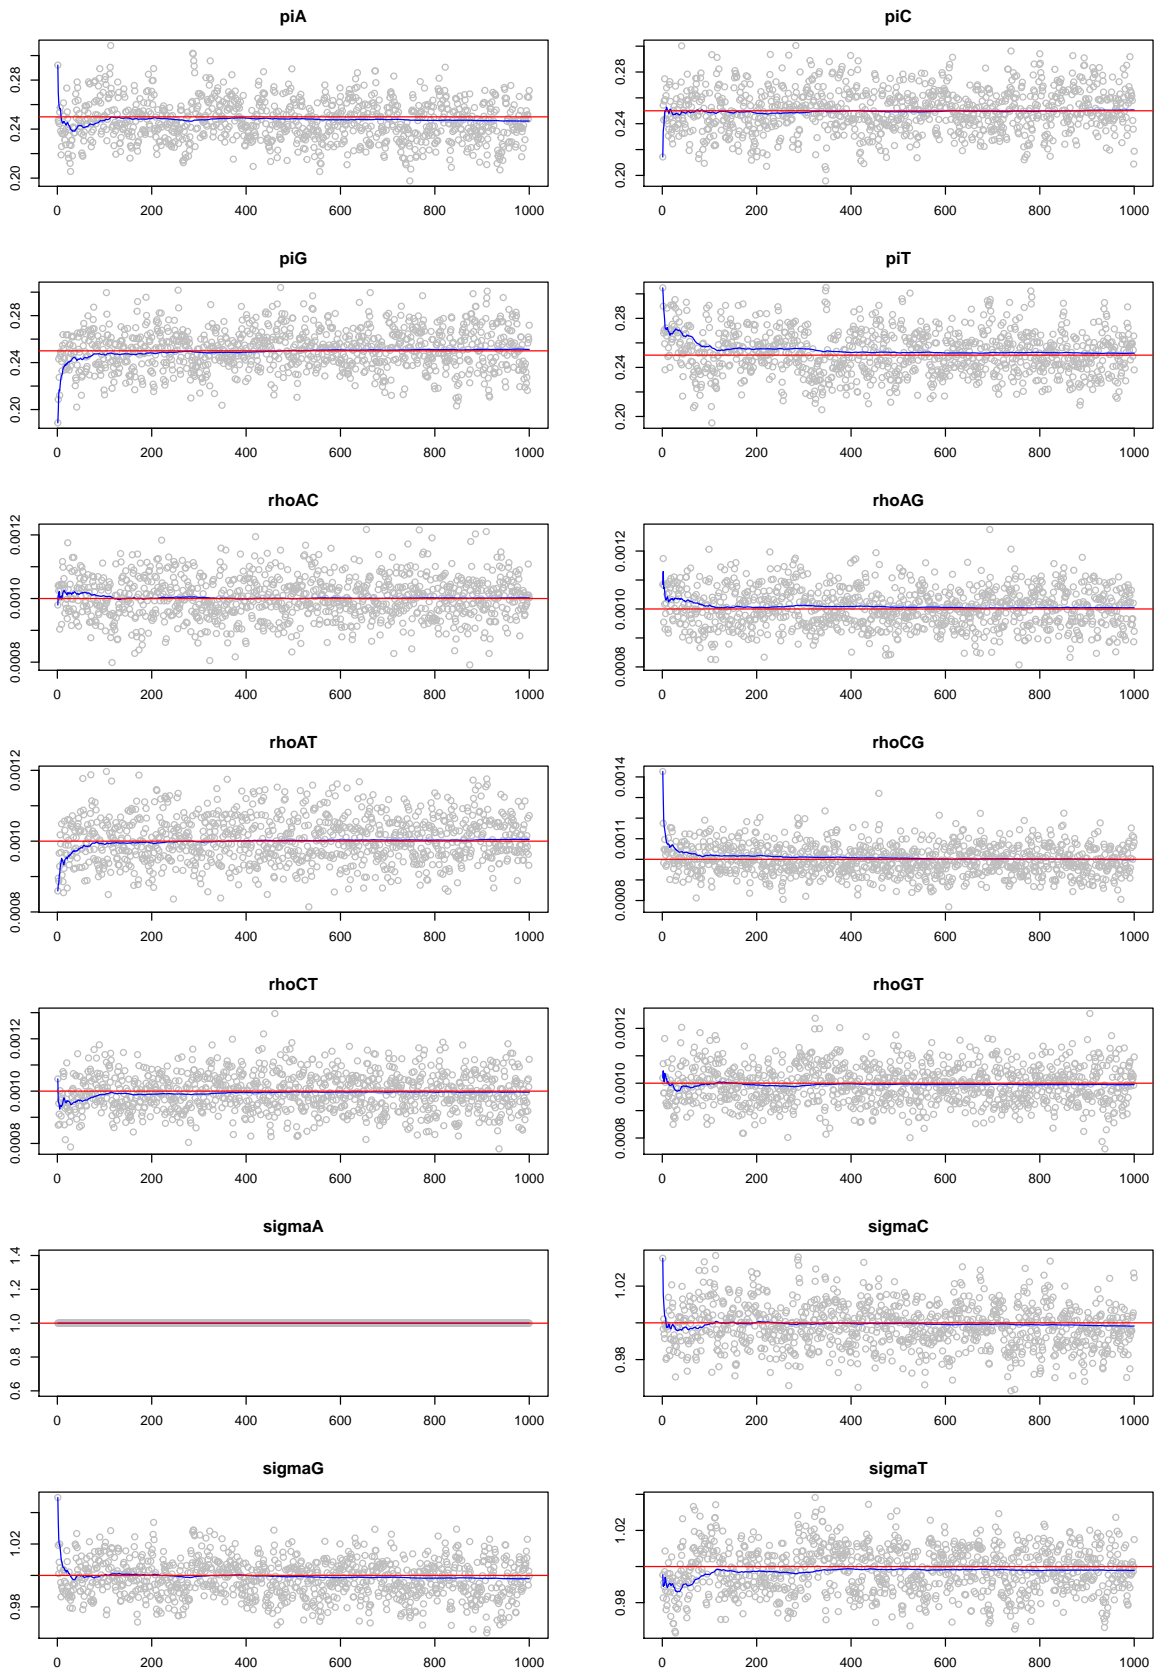

Figure S5: **Validation of the Bayesian algorithms.** Simulation conditions: 1000000 sites, 10 individuals and a complex parameter vector for the Moran model with allelic selection:  $\pi = (0.10, 0.20, 0.30, 0.40)$ ,  $\rho = (0.003, 0.006, 0.009, 0.011, 0.014, 0.017)$ ,  $\sigma = (1.00, 1.01, 1.02, 1.03)$ . The blue line represents the MCMC moving average whereas the red one represents the true values.

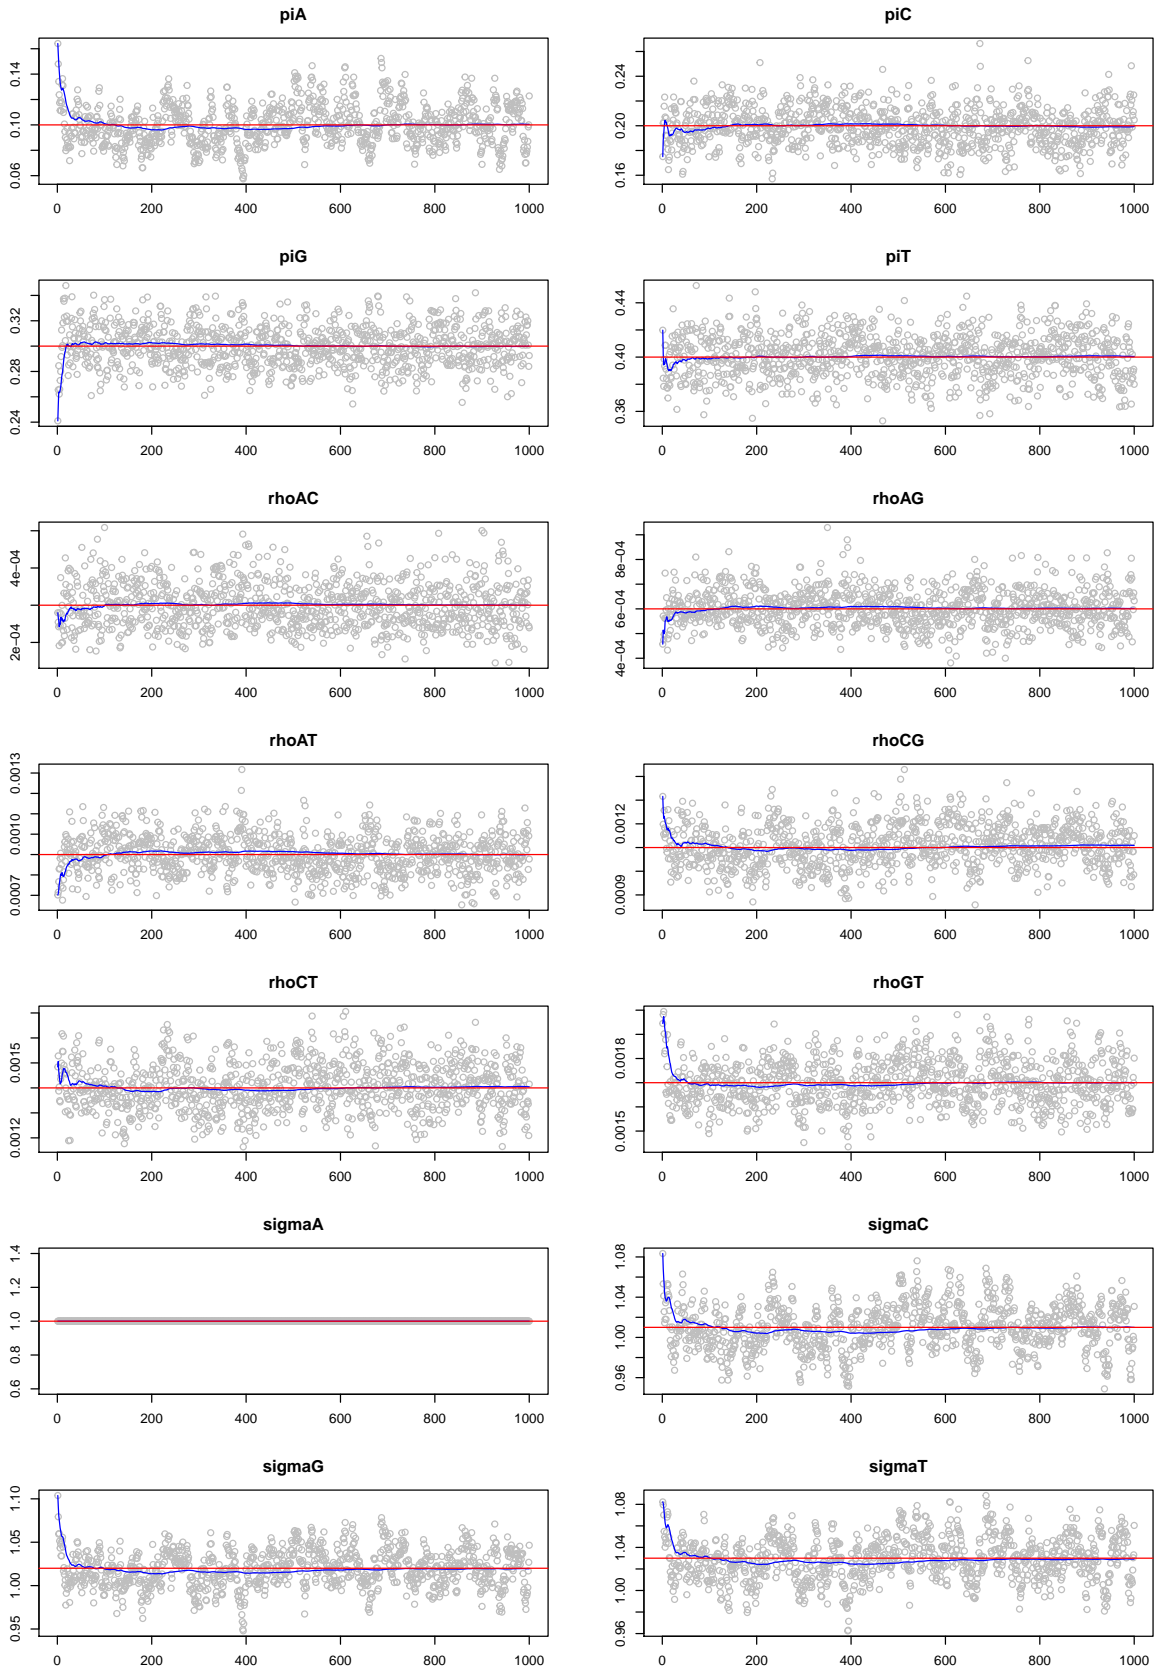

Figure S6: **Prediction of the site-frequency spectrum in great ape populations.** The gray points represent the observed counts and the vertical lines the posterior predictive distribution of the stationary distribution under the 4-variate Moran model: boundary mutation model (blue) and allelic selection model (red).

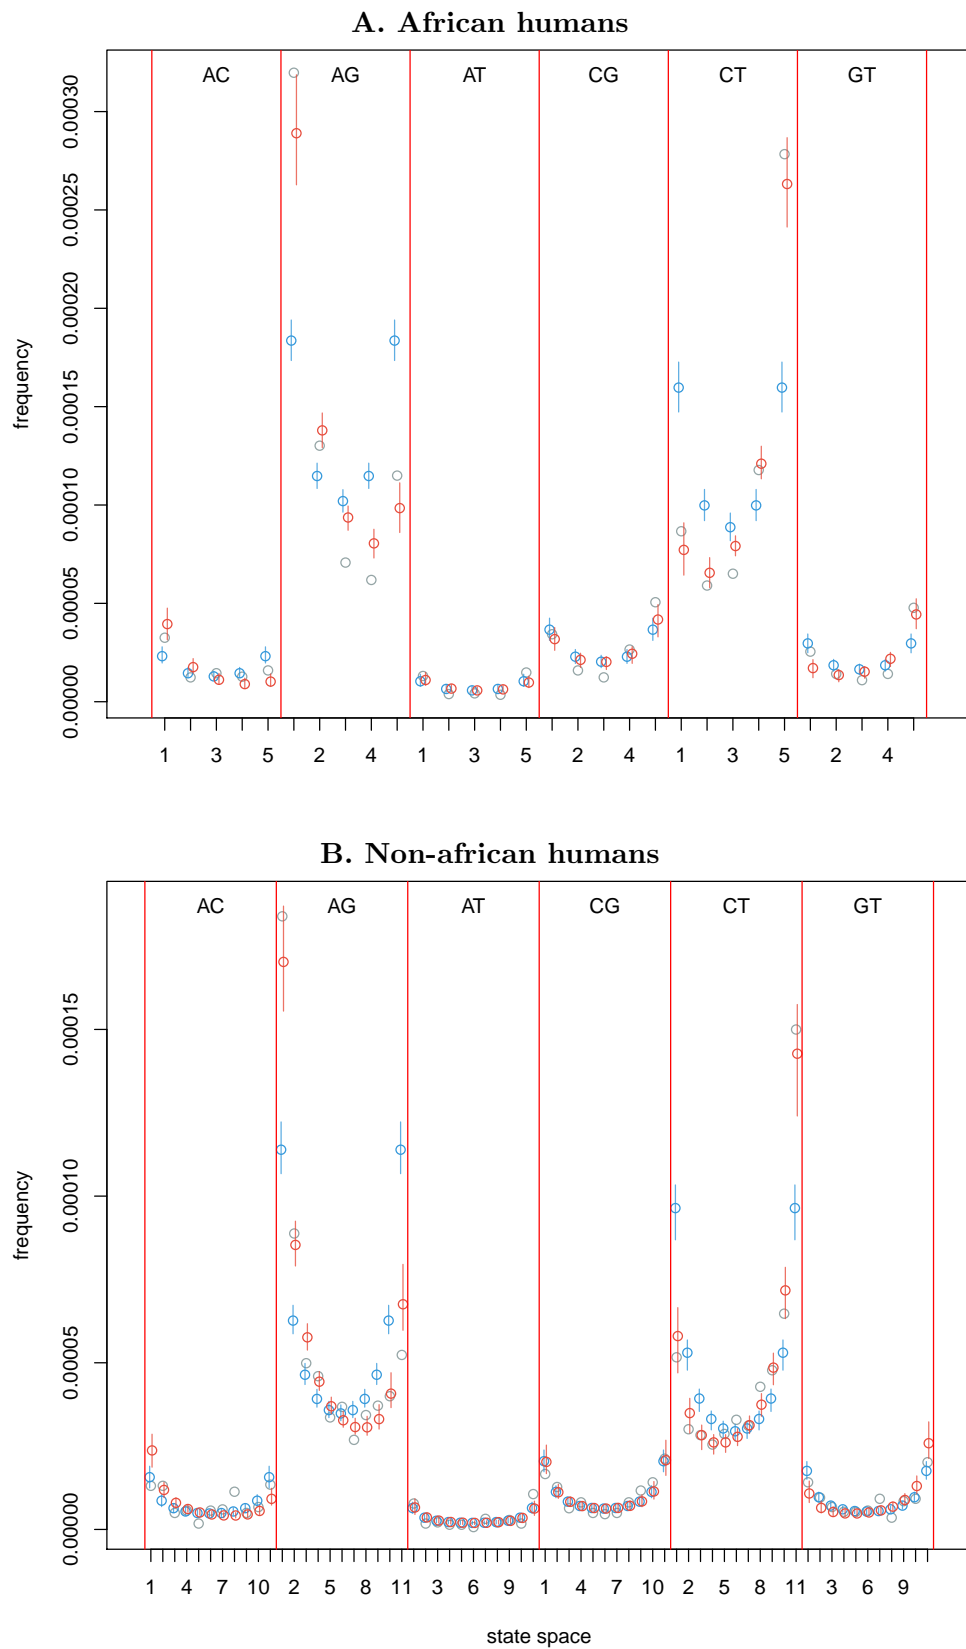

### C. Eastern gorillas

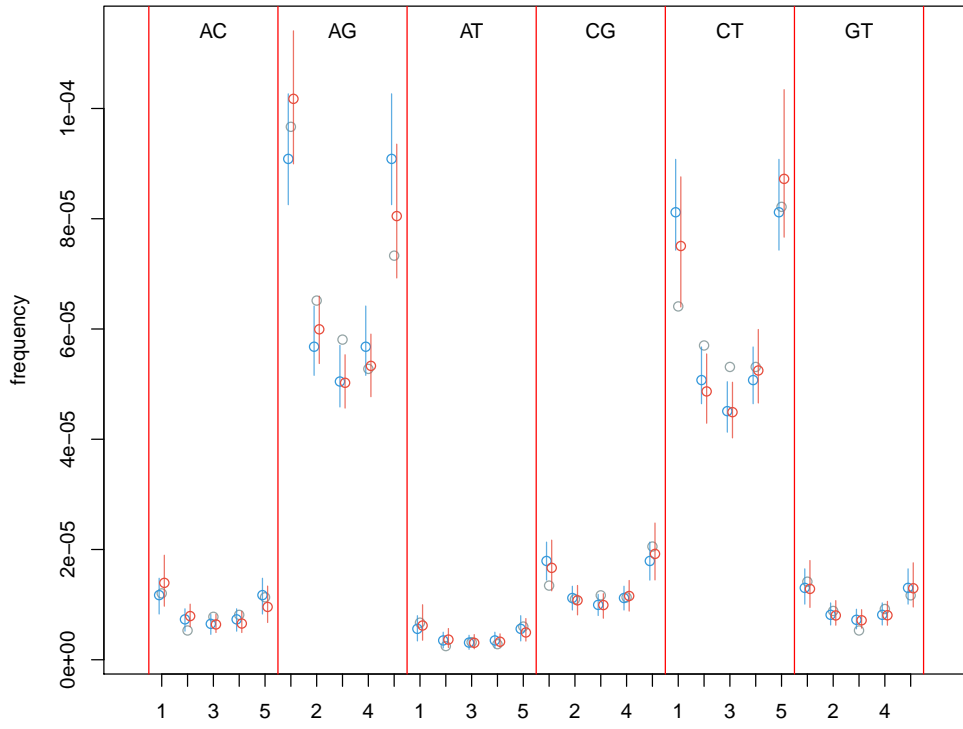

### D. Western gorillas

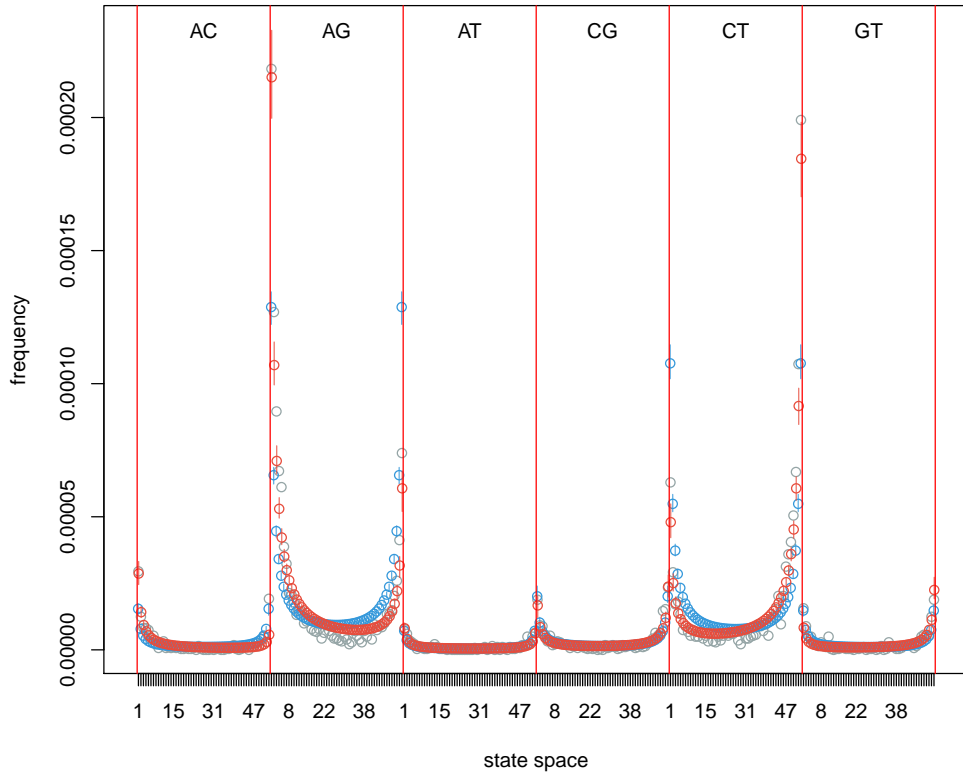

### E. Western chimpanzees

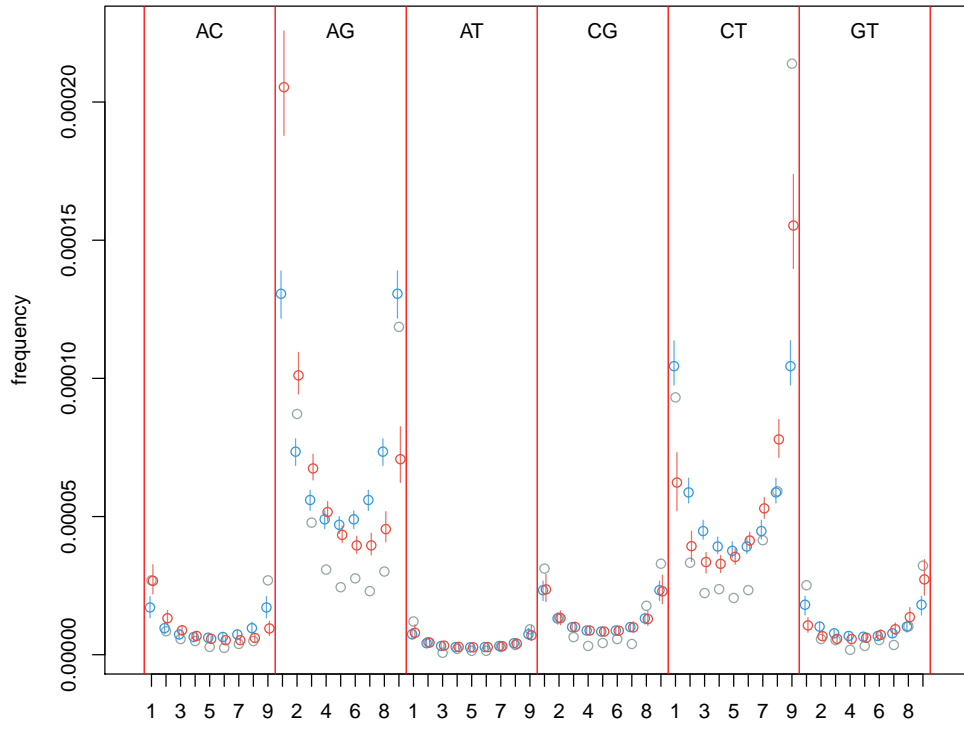

### F. Nigeria-Cameroon chimpanzees

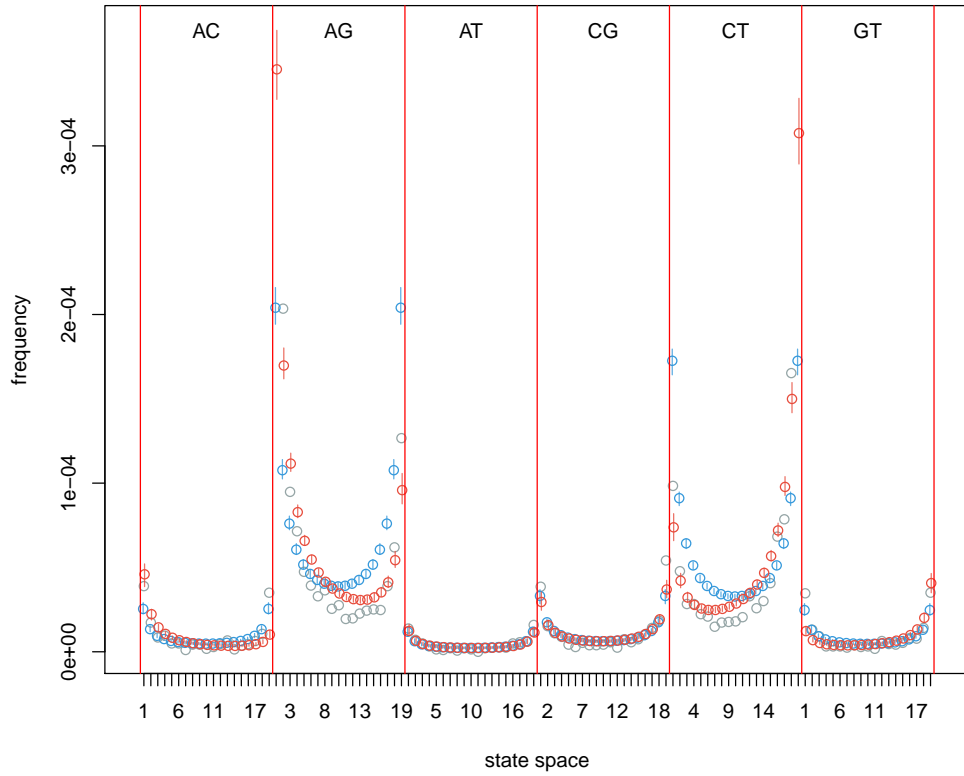

### G. Eastern chimpanzees

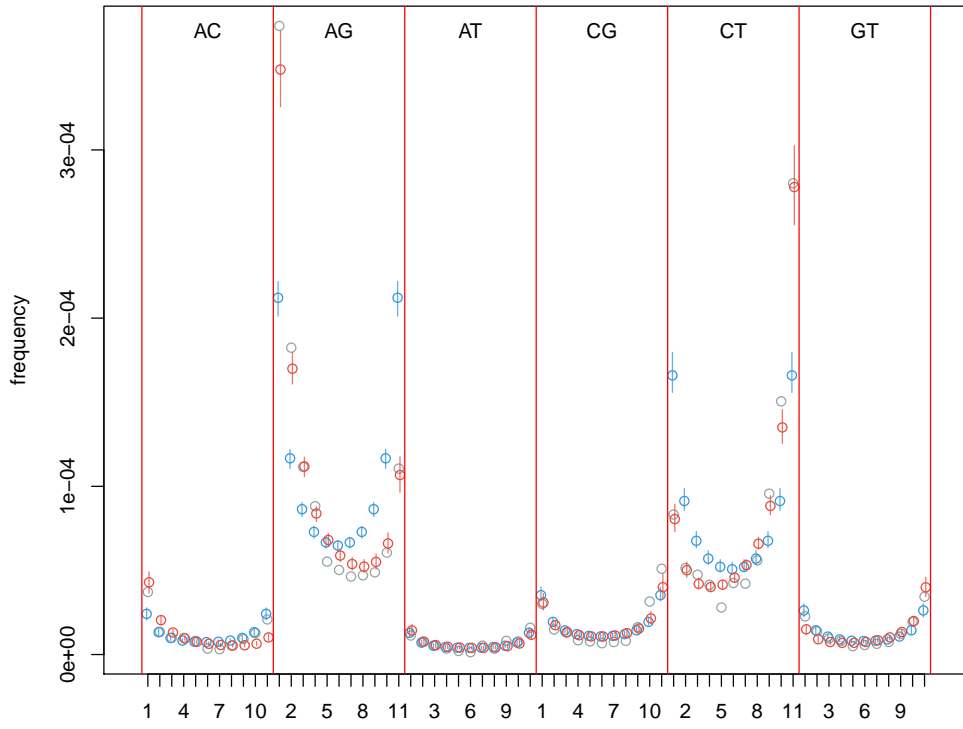

### H. Central chimpanzees

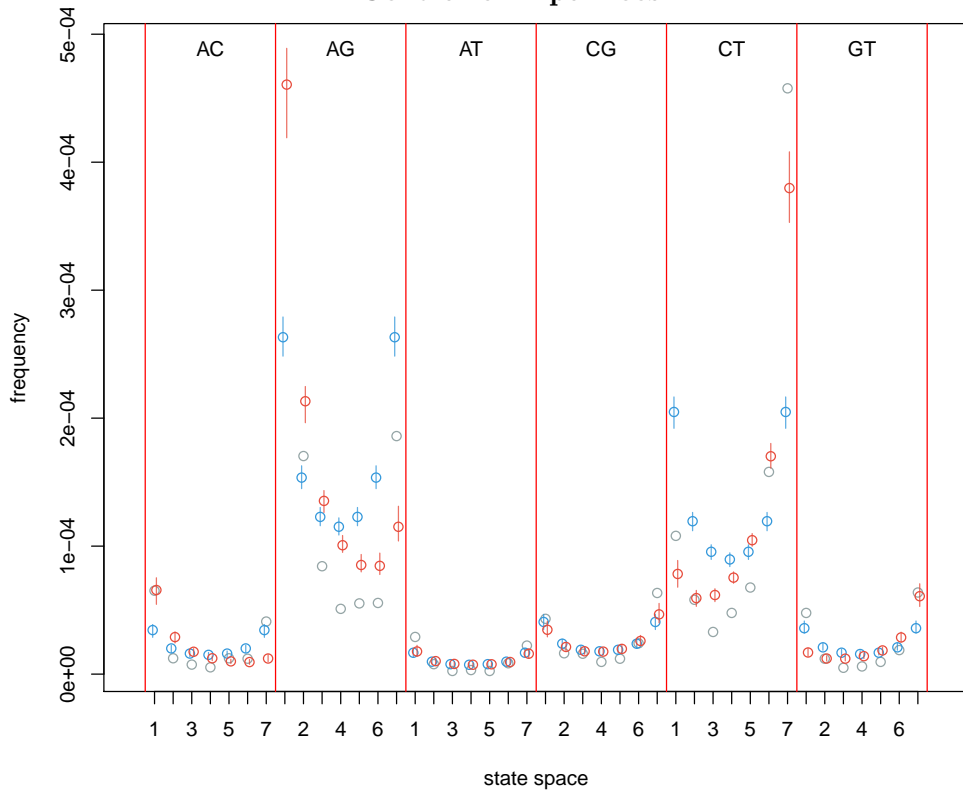

### I. Bonobos

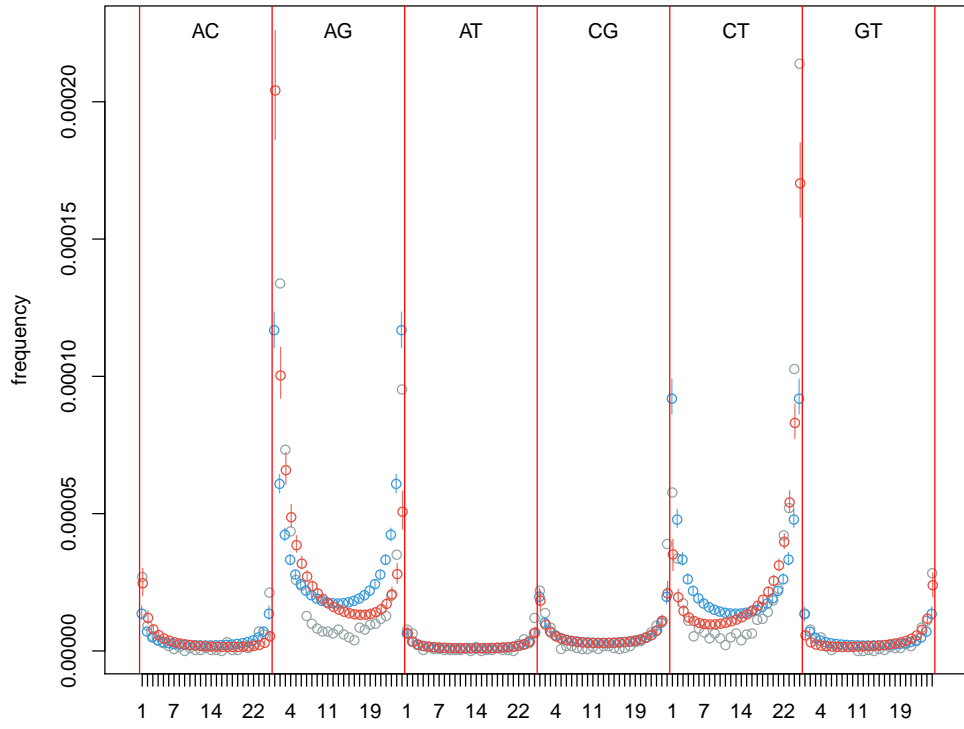

### J. Bornean orangutans

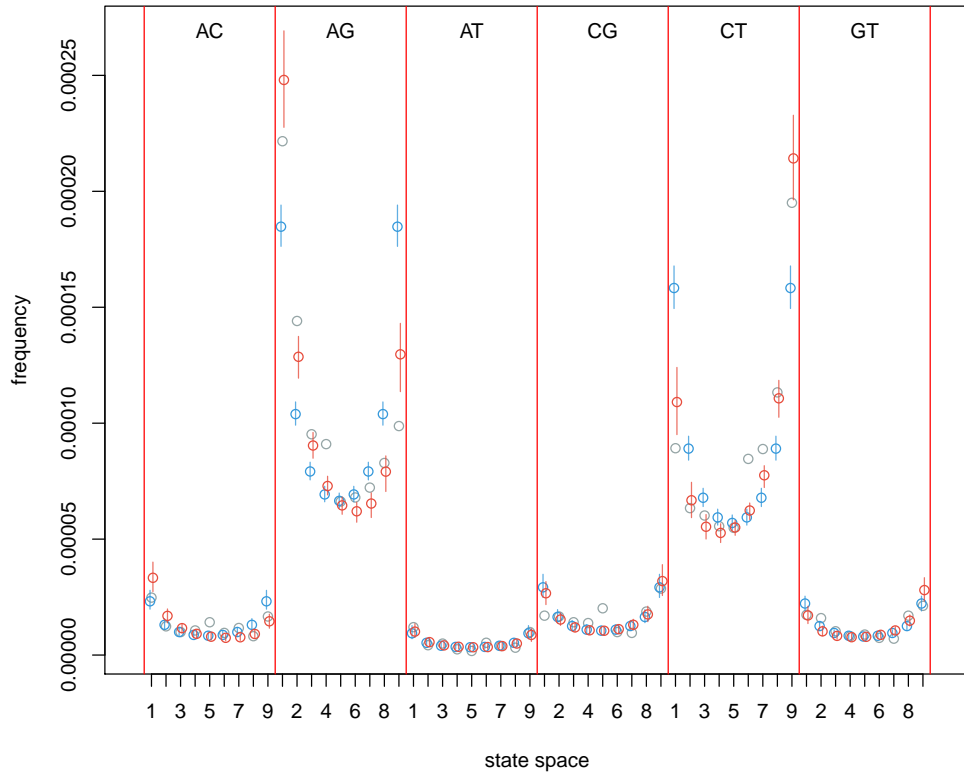



### K. Sumatran orangutans

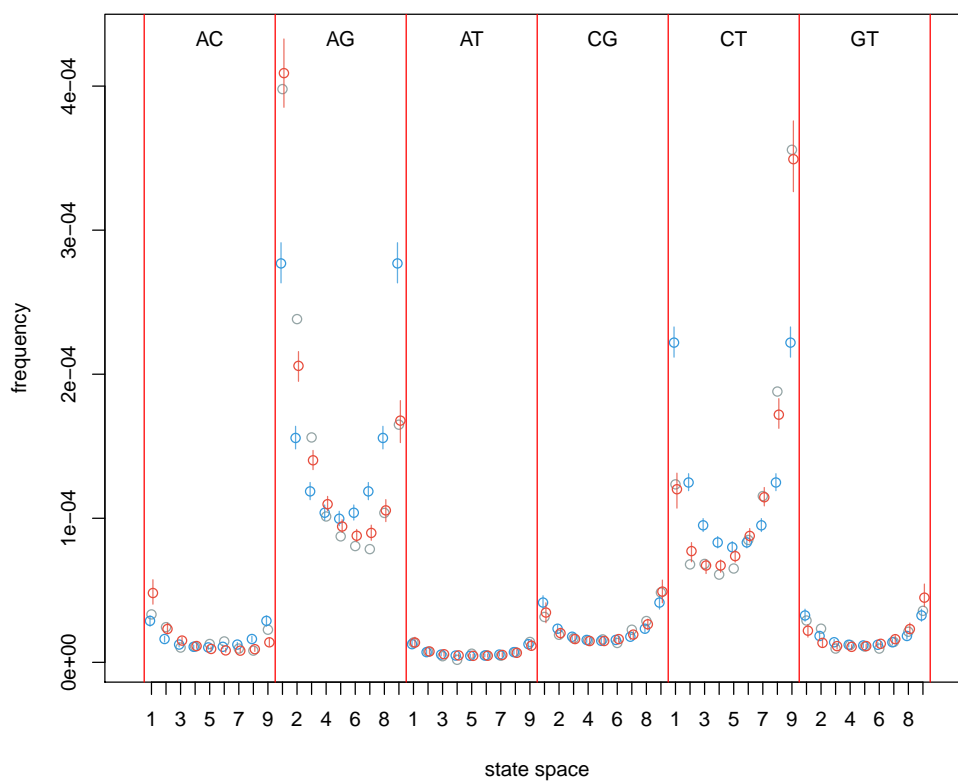

Figure S7: **GC-bias vs. recombination rate and chromosome length in non-African humans.** The scaled selection coefficients were estimated based on the posterior average. Recombination rates were estimated by comparing the genetic distance (cM) between markers to the physical (Mb) as described in (Jensen-Seaman (2004)) and based on the human Iceland pedigree map.

**A.  $\sigma$  versus recombination rate**

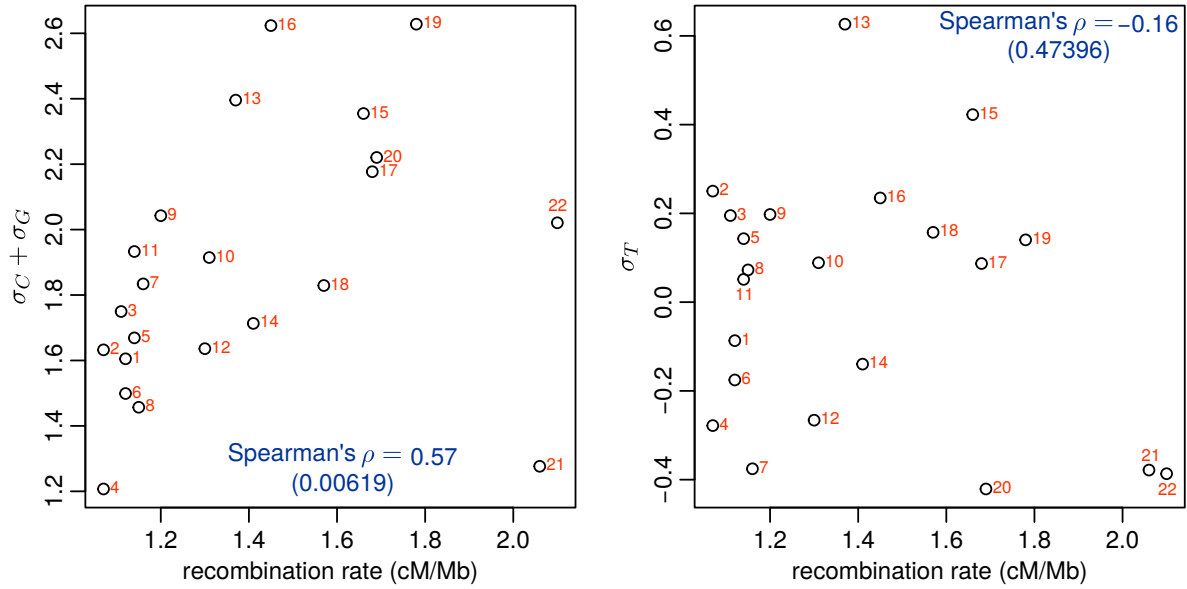

**B.  $\sigma$  versus chromosome length**

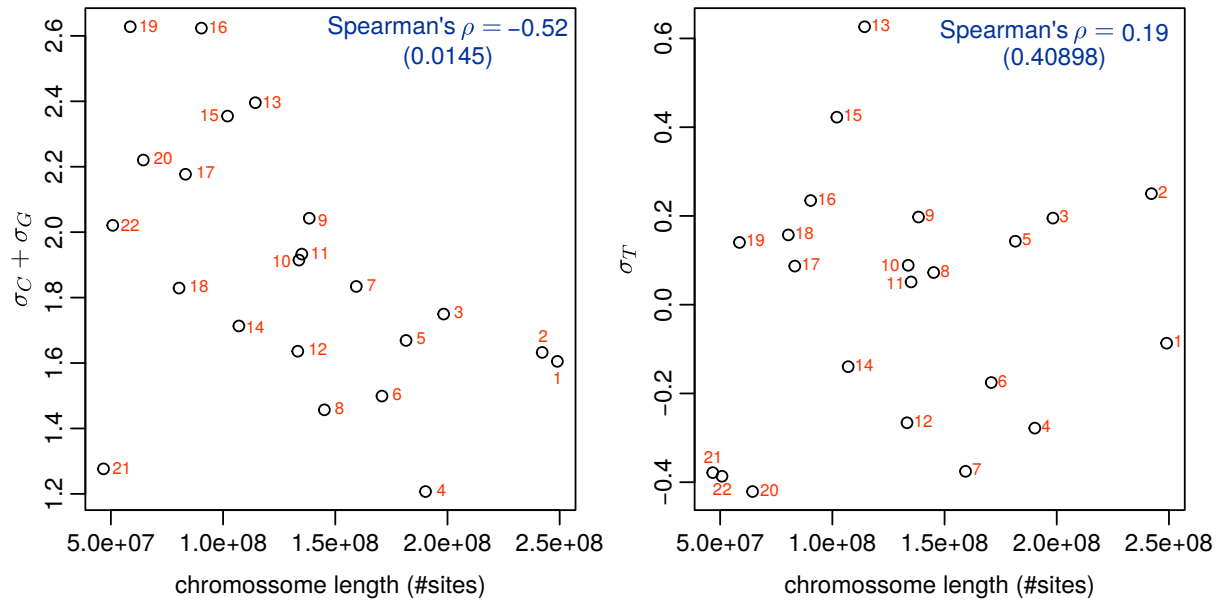

Table S1: **Simulation schemes.** Simulation schemes used to validate the Bayesian algorithms for estimating the model parameters under the multivariate Moran model with mutation (M schemes) and mutation plus selection (S schemes).  $\sigma_A$  is set to 1.

| Scheme | $\pi_A$ | $\pi_C$ | $\pi_G$ | $\pi_T$ | $\rho_{AC}$ | $\rho_{AG}$ | $\rho_{AT}$ | $\rho_{CG}$ | $\rho_{CT}$ | $\rho_{GT}$ | $\sigma_A$ | $\sigma_C$ | $\sigma_G$ | $\sigma_T$ |
|--------|---------|---------|---------|---------|-------------|-------------|-------------|-------------|-------------|-------------|------------|------------|------------|------------|
| M1     | 0.25    | 0.25    | 0.25    | 0.25    | 0.001       | 0.001       | 0.001       | 0.001       | 0.001       | 0.001       | -          | -          | -          | -          |
| M2     | 0.22    | 0.30    | 0.23    | 0.25    | 0.00028     | 0.00300     | 0.00016     | 0.00036     | 0.00172     | 0.00033     | -          | -          | -          | -          |
| S1     | 0.25    | 0.25    | 0.25    | 0.25    | 0.001       | 0.001       | 0.001       | 0.001       | 0.001       | 0.001       | 1          | 1          | 1          | 1          |
| S2     | 0.22    | 0.30    | 0.23    | 0.25    | 0.00028     | 0.00300     | 0.00016     | 0.00036     | 0.00172     | 0.00033     | 1          | 1.030      | 1.024      | 1.004      |

Table S2: **Great apes mutation rates and selection coefficients.** Scaled mutation rates and selection coefficients estimated for the great apes populations using the multivariate Moran model with boundary mutations and allelic selection.

| Population                   | $\mu_{AC}$ | $\mu_{CA}$ | $\mu_{AG}$ | $\mu_{GA}$ |
|------------------------------|------------|------------|------------|------------|
| African humans               | 0.000237   | 0.000934   | 0.002248   | 0.008030   |
| Non-african humans           | 0.000464   | 0.000957   | 0.003411   | 0.008700   |
| Eastern gorillas             | 0.000220   | 0.000257   | 0.001850   | 0.002280   |
| Western gorillas             | 0.001383   | 0.005259   | 0.014739   | 0.049773   |
| Bonobos                      | 0.000617   | 0.002196   | 0.005840   | 0.022977   |
| Nigeria-Cameroon chimpanzees | 0.000896   | 0.003185   | 0.008399   | 0.029962   |
| Eastern chimpanzees          | 0.000516   | 0.001829   | 0.005393   | 0.018297   |
| Central chimpanzees          | 0.000391   | 0.002039   | 0.003698   | 0.017267   |
| Western chimpanzees          | 0.000391   | 0.000913   | 0.002932   | 0.008944   |
| Sumatran orangutans          | 0.000573   | 0.001699   | 0.006940   | 0.017486   |
| Bornean orangutans           | 0.000604   | 0.001116   | 0.005353   | 0.010287   |

  

| Population                   | $\mu_{AT}$ | $\mu_{TA}$ | $\mu_{CG}$ | $\mu_{GC}$ |
|------------------------------|------------|------------|------------|------------|
| African humans               | 0.000224   | 0.000233   | 0.000982   | 0.000888   |
| Non-african humans           | 0.000318   | 0.000296   | 0.000838   | 0.001036   |
| Eastern gorillas             | 0.000114   | 0.000134   | 0.000352   | 0.000373   |
| Western gorillas             | 0.001508   | 0.001765   | 0.004350   | 0.003859   |
| Bonobos                      | 0.000761   | 0.000639   | 0.001869   | 0.002065   |
| Nigeria-Cameroon chimpanzees | 0.000998   | 0.000964   | 0.002558   | 0.002566   |
| Eastern chimpanzees          | 0.000594   | 0.000655   | 0.001700   | 0.001626   |
| Central chimpanzees          | 0.000511   | 0.000514   | 0.001457   | 0.001304   |
| Western chimpanzees          | 0.000289   | 0.000293   | 0.000788   | 0.001028   |
| Sumatran orangutans          | 0.000475   | 0.000515   | 0.001739   | 0.001477   |
| Bornean orangutans           | 0.000359   | 0.000378   | 0.001065   | 0.001108   |

  

| Population                   | $\mu_{CT}$ | $\mu_{TC}$ | $\mu_{GT}$ | $\mu_{TG}$ |
|------------------------------|------------|------------|------------|------------|
| African humans               | 0.006177   | 0.001625   | 0.001235   | 0.000360   |
| Non-african humans           | 0.005777   | 0.002607   | 0.001324   | 0.000484   |
| Eastern gorillas             | 0.001609   | 0.001619   | 0.000291   | 0.000277   |
| Western gorillas             | 0.033763   | 0.010382   | 0.005220   | 0.001810   |
| Bonobos                      | 0.015136   | 0.003569   | 0.002698   | 0.000576   |
| Nigeria-Cameroon chimpanzees | 0.021183   | 0.005752   | 0.003521   | 0.000954   |
| Eastern chimpanzees          | 0.011799   | 0.003667   | 0.002102   | 0.000683   |
| Central chimpanzees          | 0.011798   | 0.002272   | 0.002279   | 0.000491   |
| Western chimpanzees          | 0.005329   | 0.002309   | 0.001194   | 0.000397   |
| Sumatran orangutans          | 0.012329   | 0.004508   | 0.001913   | 0.000825   |
| Bornean orangutans           | 0.007159   | 0.004084   | 0.001160   | 0.000636   |

  

| Population                   | $\sigma_C$ | $\sigma_G$ | $\sigma_T$ |
|------------------------------|------------|------------|------------|
| African humans               | 2.415      | 1.864      | 0.193      |
| Non-african humans           | 1.192      | 1.161      | 0.053      |
| Eastern gorillas             | 0.592      | 0.357      | 0.346      |
| Western gorillas             | 1.711      | 1.334      | 0.285      |
| Bonobos                      | 1.705      | 1.551      | -0.057     |
| Nigeria-Cameroon chimpanzees | 1.741      | 1.473      | 0.091      |
| Eastern chimpanzees          | 1.858      | 1.506      | 0.241      |
| Central chimpanzees          | 2.600      | 2.083      | 0.145      |
| Western chimpanzees          | 1.385      | 1.420      | 0.150      |
| Sumatran orangutans          | 1.687      | 1.176      | 0.228      |
| Bornean orangutans           | 1.087      | 0.846      | 0.194      |
