# Supplementary material for: Quantifying GC-biased gene conversion in great ape genomes using polymorphism-aware models
Source: bioRxiv or medRxiv preprint supplement (doi:10.1101/380246), 2019-03-20
Supplement: Supplementary file [file 380246-1.pdf]

## Supplementary material

479

### Quantifying GC-biased gene conversion in great ape genomes using polymorphism-aware models

480

481

Rui Borges<sup>1</sup>, Gergely Szöllősi<sup>2</sup>, and Carolin Kosiol<sup>1,3\*</sup>

482

1. Institute of Population Genetics, Vetmeduni Vienna, Veterinärplatz 1, 1210 Wien, Austria

483

2. Department of Biological Physics, ELTE-MTA "Lendulet" Biophysics Research Group, Eötvös University, Pázmány P. stny. 1A, Budapest H-1117, Hungary.

484

485

3. Centre for Biological Diversity, University of St Andrews, St Andrews, Fife KY16 9TH, UK

486

\* corresponding author: ck202@st-andrews.ac.uk

487

## Supplementary File S1. Proof of the stationary vector

Let  $\psi$  be a stationary vector of  $\mathbf{Q}$  and  $\psi_{ij}^n$  the element of the stationary vector corresponding to the state  $\{ni, (N-n)j\}$ . In the multivariate Moran model with low mutation rates and selection, mutation is only occurring in the boundary states, permitting the monomorphic states to communicate with the polymorphic states, while drift and selection are both acting among the polymorphic states. The detailed balance conditions can be defined and lead to equations for the monomorphic and the polymorphic states. In the boundary states, an allele  $i$  is either fixed ( $n = N$ ) or absent ( $n = 0$ , i.e.  $j$  is fixed), for which we may write

$$\psi_i q_{ij}^{N \rightarrow N-1} = \psi_j q_{ij}^{N-1 \rightarrow N} \quad \psi_j q_{ij}^{0 \rightarrow 1} = \psi_i q_{ij}^{1 \rightarrow 0} \quad , \quad (8)$$

while between the polymorphic states, the general condition is valid

$$\psi_{ij}^n q_{ij}^{n \rightarrow n+1} = \psi_{ij}^{n+1} q_{ij}^{n+1 \rightarrow n} \quad . \quad (9)$$

Condition (9) can be rewritten in the recursive form

$$\psi_{ij}^{n+1} = \psi_{ij}^n \frac{q_{ij}^{n \rightarrow n+1}}{q_{ij}^{n+1 \rightarrow n}} \quad (10)$$

and then combined with equation (8)

$$\psi_i q_{ij}^{N \rightarrow N-1} = \psi_{ij}^n \frac{q_{ij}^{n \rightarrow n+1}}{q_{ij}^{n+1 \rightarrow n}} \cdots \frac{q_{ij}^{N-2 \rightarrow N-1}}{q_{ij}^{N-1 \rightarrow N-2}} q_{ij}^{N-1 \rightarrow N} = \psi_{ij}^n q_{ij}^{n \rightarrow n+1} \prod_{r=n+1}^{N-1} \frac{q_{ij}^{r \rightarrow r+1}}{q_{ij}^{r \rightarrow r-1}} \quad . \quad (11)$$

The product can be further simplified by recognizing that for  $r = N - 1$ ,  $q_{ij}^{N \rightarrow N-1} = \mu_{ij} = \pi_j \rho_{ij}$ , while for  $r < N - 1$ , the rates inside the product are just the combined rate of drift and selection (according to expression (2)). We can now rewrite equation (10) in order to the  $\psi_{ij}^n$  element of the stationary vector of  $\mathbf{Q}$

$$\psi_{ij}^n = \frac{\psi_i \pi_j \rho_{ij}}{q_{ij}^{n \rightarrow n+1}} \left( \frac{1 + \sigma_j}{1 + \sigma_i} \right)^{N-n-1} \quad . \quad (12)$$

Because  $\psi_{ij}^0 = \psi_j$  and  $q_{ij}^{0 \rightarrow 1} = \mu_{ij} = \pi_i \rho_{ij}$ , we obtain a possible solution for the monomorphic states of the stationary distribution by making  $n = 0$  in equation (12)

$$\frac{\psi_j}{\psi_i} = \frac{\pi_j}{\pi_i} \left( \frac{1 + \sigma_j}{1 + \sigma_i} \right)^{N-1} \quad . \quad (13)$$

The stationary solution for the polymorphic states can be obtained by combining equations (12) and (13)

$$\psi_{ij}^n = \pi_i \pi_j \rho_{ij} (1 + \sigma_i)^{n-1} (1 + \sigma_j)^{N-n-1} \frac{N}{n(N-n)} \quad . \quad (14)$$

The stationary distribution obtained here can be related with the stationary vector of the neutral boundary multivariate Moran model. We observe that when  $\sigma = \mathbf{0}$ , we obtain the solution computed by Schrempf et al. (2016) for the multivariate Moran model with drift only

$$\psi_i = \pi_i \quad \psi_{ij}^n = \pi_i \pi_j \rho_{ij} \frac{N}{n(N-n)} \quad . \quad (15)$$

## References:

Schrempf, D., Minh, B. Q., De Maio, N., von Haeseler, A., & Kosiol, C. (2016). Reversible polymorphism-aware phylogenetic models and their application to tree inference. *Journal of Theoretical Biology*, 407, 362-370.

**Supplementary File S2. Proof of the expected number of Moran events per unit of time**

511

To assess the impact of allelic selection in branch length estimation (or the total rate of the process), we computed the expected number of events per unit of time for the multivariate Moran model with selection

512

513

$$d_S(t = 1) = - \sum_u \psi_u q_{uu} \quad , \quad (16)$$

Where  $\psi$  is the stationary vector and  $q_{uu}$  the diagonal elements of  $\mathbf{Q}$ . Equation (16) can be solved by observing that a monomorphic state can only be escaped by mutation, while a polymorphic state can only be escaped by selection and drift

514

515

516

$$d_S = \sum_{i \in \mathcal{A}} \sum_{j \neq i} \psi_i \mu_{ij} + \sum_{ij \in \mathcal{A}^C} \sum_{n=1}^{N-1} \psi_{ij}^n \frac{n(N-n)}{N} (1 + \sigma_i + 1 + \sigma_j) \quad . \quad (17)$$

The stationary vector is known from equations (13) and (14)

517

$$d_S = \frac{1}{k} \sum_{i \in \mathcal{A}} \sum_{j \neq i} (1 + \sigma_i)^{N-1} \pi_i \rho_{ij} \pi_j + \frac{1}{k} \sum_{ij \in \mathcal{A}^C} \sum_{n=1}^{N-1} \pi_i \rho_{ij} \pi_j [(1 + \sigma_i)^n (1 + \sigma_j)^{N-n-1} + (1 + \sigma_i)^{n-1} (1 + \sigma_j)^{N-n}] \quad , \quad (18)$$

where  $k$  is the normalization constant defined in equation (4). Expression (18) can be further simplified by observing that the sum in  $n$  results in doubling every  $(1 + \sigma_i)^{n-1} (1 + \sigma_j)^{N-n}$  element. Therefore, the expected number of events can be simplified to

518

519

520

$$d_S = \frac{2}{k} \sum_{ij \in \mathcal{A}^C} \sum_{n=1}^N \pi_i \rho_{ij} \pi_j (1 + \sigma_i)^{n-1} (1 + \sigma_j)^{N-n} \quad . \quad (19)$$

**Supplementary File S3. Proof of the Moran distance in number substitutions**

The Moran distance  $d_S$  accounts for several events (mutation, drift and selection) and differs from the standard evolutionary distances  $d_S^*$  because they are calculated in terms of the expected number of substitutions. A way to compare these distances is correcting the Moran distance so it only accounts for substitutions, which can be done by computing the probability of a substitution  $s$

$$d_S^* = d_S \times s \quad . \quad (20)$$

$s$  can be calculated multiplying the probability  $m$  of an event being a mutation, by the probability  $h$  of that mutation getting fixed in the population

$$s = \sum_{ij \in \mathcal{A}^P} s_{i \rightarrow j} = \sum_{ij} m_{i \rightarrow j} \times h_{j|i} \quad , \quad (21)$$

where  $\mathcal{A}^P$  represents all the possible pair-wise permutations without repetition of  $K$  alleles.

**1. Solving  $m_{i \rightarrow j}$**

The probability of an event being a mutation is simply the ratio between the rate of mutation and the total rate (i.e the rate of mutation plus the rate of drift and selection). In stationarity, we know that the total rate  $r_T = d_S(1)$  is simply the expected number of events of the Moran model and follows equation (19). The rate of a  $i \rightarrow j$  mutation is the rate of escaping the monomorphic state  $\{Ni\}$ , from which we can write

$$m_{i \rightarrow j} = \frac{r_{i \rightarrow j}}{r_T} = \frac{\pi_i \pi_j \rho_{ij} (1 + \sigma_i)^{N-1}}{2 \sum_{ij \in \mathcal{A}^C} \sum_{n=1}^N \pi_i \pi_j \rho_{ij} (1 + \sigma_i)^{n-1} (1 + \sigma_j)^{N-n}} \quad . \quad (22)$$

We can see that  $m_{i \rightarrow j}$  differs from  $m_{j \rightarrow i}$  only due to the selection coefficient in the numerator.

**2. Solving  $h_{i|j}$**

According to Kluth and Baake (2013), the fixation probability of an allele with fitness  $1 + \sigma$  is for the Moran model

$$h = \frac{(1 + \sigma)^{N-1}}{\sum_{n=0}^{N-1} (1 + \sigma)^n} \quad . \quad (23)$$

As we are using the multivariate Moran model, we have to extend the denominator of (23) to account for the different possible combinations of two selection coefficients. In particular, we may have

$$h_{i|j} = \frac{(1 + \sigma_i)^N}{\sum_{n=1}^N (1 + \sigma_i)^n (1 + \sigma_j)^{N-n}} \quad \text{and} \quad h_{j|i} = \frac{(1 + \sigma_j)^N}{\sum_{n=1}^N (1 + \sigma_j)^n (1 + \sigma_i)^{N-n}} \quad . \quad (24)$$

We further redefine the denominators in order to make them equal

$$h_{i|j} = \frac{(1 + \sigma_i)^N (1 + \sigma_j)}{\sum_{n=1}^N (1 + \sigma_i)^n (1 + \sigma_j)^{N-n+1}} \quad \text{and} \quad h_{j|i} = \frac{(1 + \sigma_j)^N (1 + \sigma_i)}{\sum_{n=1}^N (1 + \sigma_j)^n (1 + \sigma_i)^{N-n+1}} \quad . \quad (25)$$

### 3. Solving $s$

The probability of a  $i \rightarrow j$  substitution under the multivariate Moran model with boundary mutations and selection can be computed as

$$s_{i \rightarrow j} = m_{i \rightarrow j} \times h_{j|i} = \frac{\pi_i \pi_j \rho_{ij} (1 + \sigma_i)^N (1 + \sigma_j)^N}{2 \times \sum_{ij \in \mathcal{A}^C} \sum_{n=1}^N \pi_i \pi_j \rho_{ij} (1 + \sigma_i)^{n-1} (1 + \sigma_j)^{N-n} \times \sum_{n=1}^N (1 + \sigma_j)^n (1 + \sigma_i)^{N-n+1}} \quad (26)$$

We see that  $s_{i \rightarrow j} = s_{j \rightarrow i}$ , which is an expected consequence of stationarity. We can now generalize  $s_{i \rightarrow j}$  for all the substitution types by using equation (21)

$$s = \frac{1}{\sum_{ij \in \mathcal{A}^C} \sum_{n=1}^N \pi_i \pi_j \rho_{ij} (1 + \sigma_i)^{n-1} (1 + \sigma_j)^{N-n}} \sum_{ij \in \mathcal{A}^C} \frac{\pi_i \pi_j \rho_{ij} (1 + \sigma_i)^N (1 + \sigma_j)^N}{\sum_{n=1}^N (1 + \sigma_j)^n (1 + \sigma_i)^{N-n+1}} \quad (27)$$

The relationship between the Moran distance in events and substitutions can be defined based on equation (20),

$$d_S^* = d_S \frac{1}{\sum_{ij \in \mathcal{A}^C} \sum_{n=1}^N \pi_i \pi_j \rho_{ij} (1 + \sigma_i)^{n-1} (1 + \sigma_j)^{N-n}} \sum_{ij \in \mathcal{A}^C} \frac{\pi_i \pi_j \rho_{ij} (1 + \sigma_i)^N (1 + \sigma_j)^N}{\sum_{n=1}^N (1 + \sigma_j)^n (1 + \sigma_i)^{N-n+1}} \quad (28)$$

This quantity can be evaluated for neutral regimes: i.e.  $\sigma \rightarrow (0, 0, 0, 0)$ . We obtain the probability of a substitutions under the neutral Moran model and it matches the result computed by Schrepf et al. (2016):

$$d_S^* = d_S \frac{1}{N^2} \quad (29)$$

### References:

- Kluth, S., & Baake, E. (2013). The Moran model with selection: Fixation probabilities, ancestral lines, and an alternative particle representation. *Theoretical Population Biology*, 90, 104-112.
- Schrepf, D., Minh, B. Q., De Maio, N., von Haeseler, A., & Kosiol, C. (2016). Reversible polymorphism-aware phylogenetic models and their application to tree inference. *Journal of Theoretical Biology*, 407, 362-370.

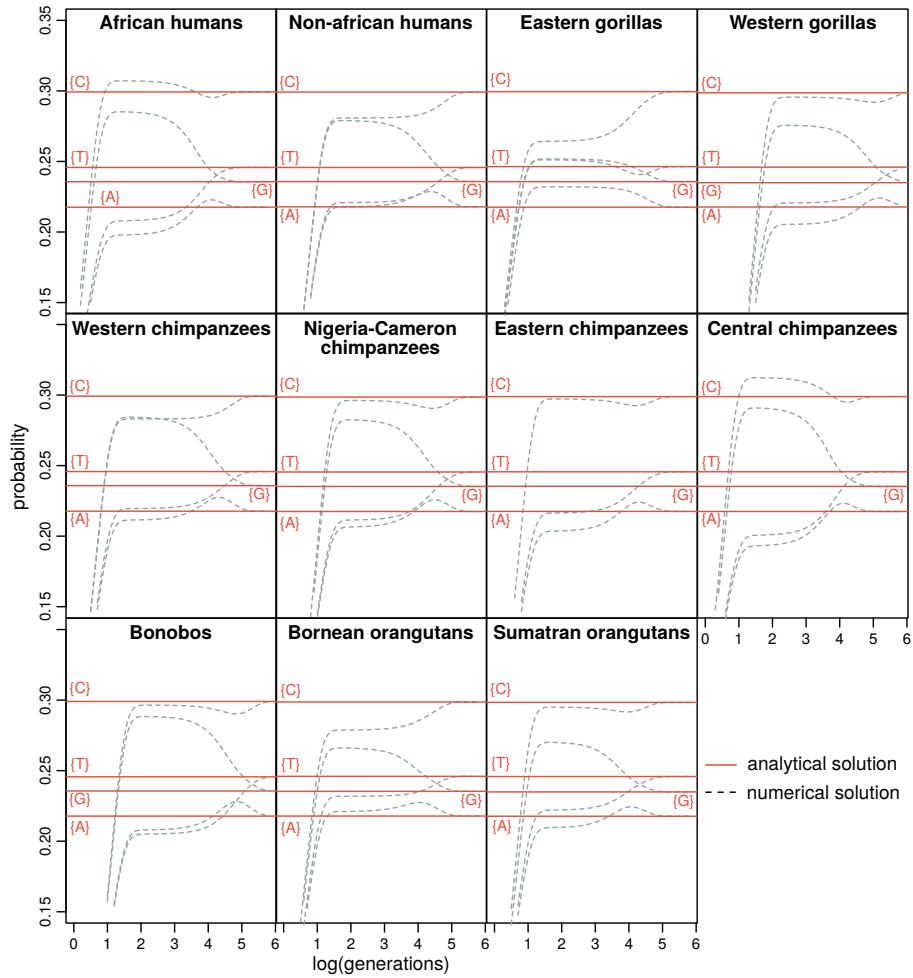

Figure S1: **Numerical validation of the stationarity vector.** Estimated vectors of  $\pi$ ,  $\rho$ ,  $\sigma$  from the great apes' data were used to calculate the rate matrix  $Q$  and the probabilities for the state space at several time points (time in generations). The initial probabilities were set uniformly as  $\frac{1}{4+6(N-1)}$ , i.e. the number of states. For sake of clarity only the monomorphic states  $\{i\}$  are represented.

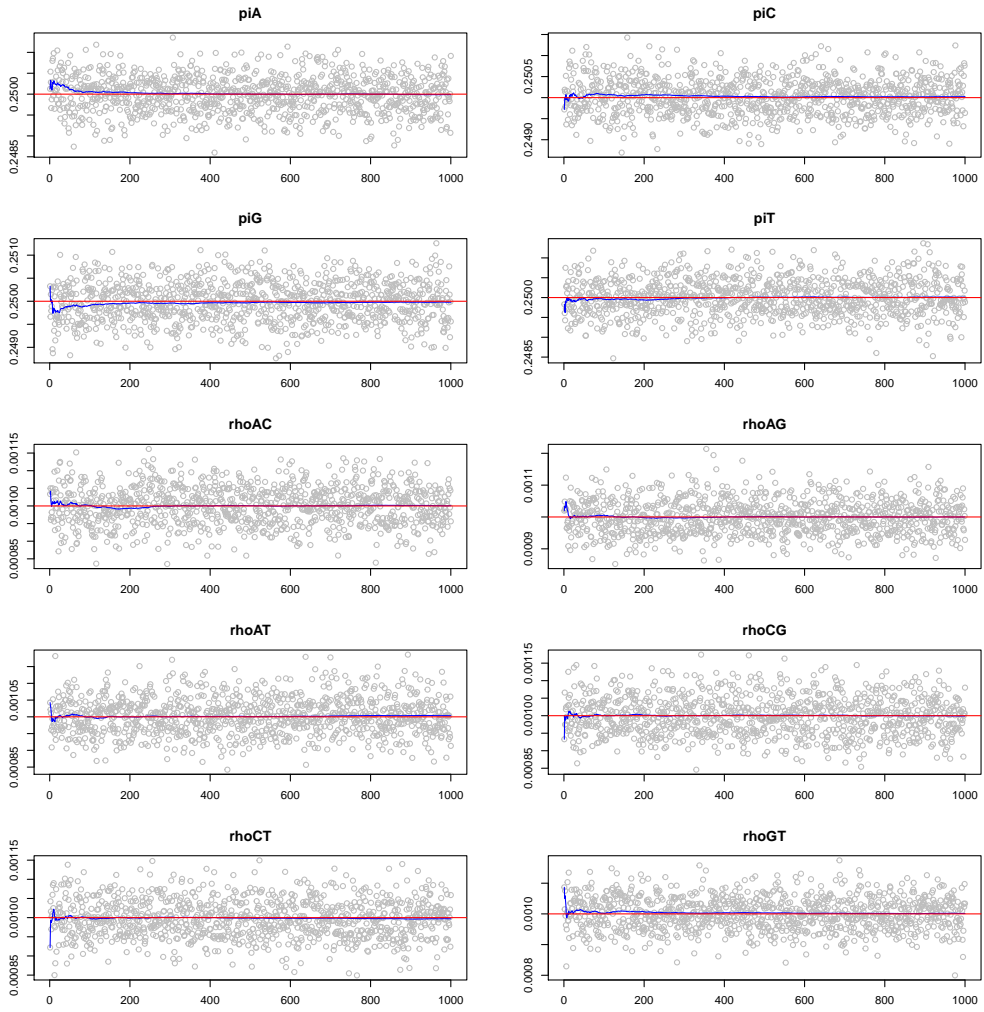

Figure S2: **Validation of the Bayesian algorithms.** Simulation conditions: 1000000 sites, 10 individuals and a simple parameter vector for the Moran model with boundary mutations:  $\boldsymbol{\pi} = (0.25, 0.25, 0.25, 0.25)$ ,  $\boldsymbol{\rho} = (0.001, 0.001, 0.001, 0.001, 0.001, 0.001)$ . The blue line represents the MCMC moving average whereas the red one represents the true values.

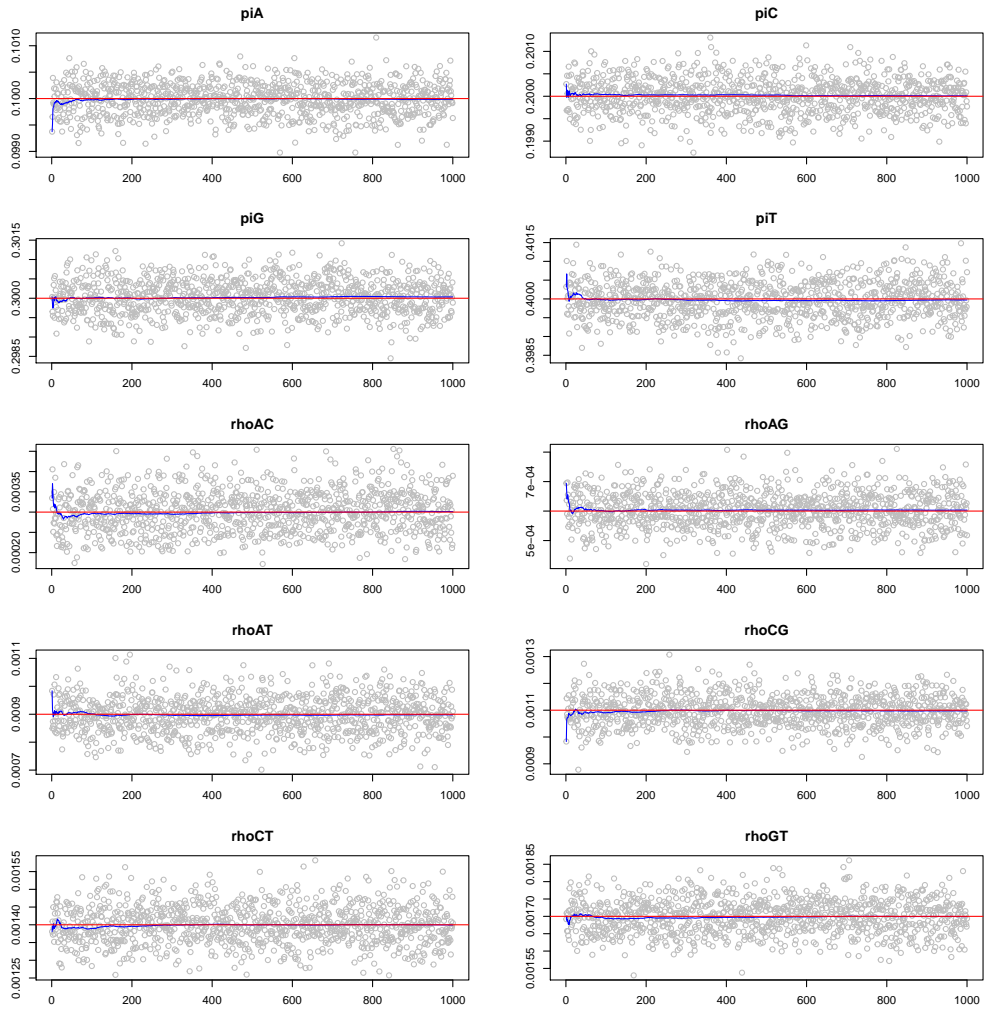

Figure S3: **Validation of the Bayesian algorithms.** Simulation conditions: 1000000 sites, 10 individuals and a complex parameter vector for the Moran model with boundary mutations:  $\boldsymbol{\pi} = (0.10, 0.20, 0.30, 0.40)$ ,  $\boldsymbol{\rho} = (0.003, 0.006, 0.009, 0.011, 0.014, 0.017)$ . The blue line represents the MCMC moving average whereas the red one represents the true values.



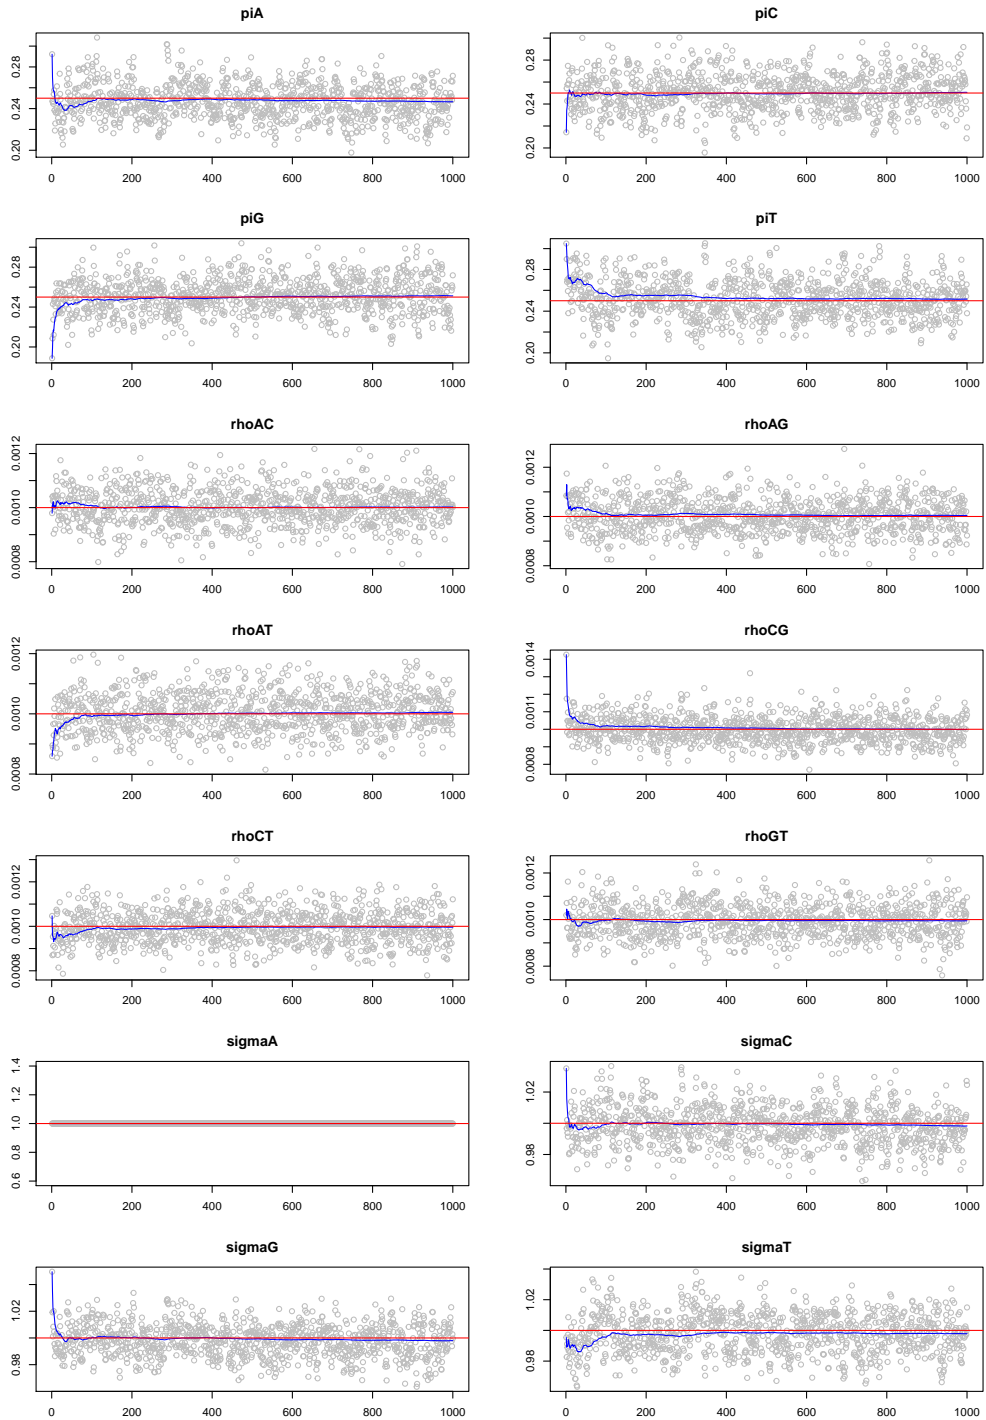

Figure S4: **Validation of the Bayesian algorithms.** Simulation conditions: 1000000 sites, 10 individuals and a simple parameter vector for the Moran model with allelic selection:  $\pi = (0.25, 0.25, 0.25, 0.25)$ ,  $\rho = (0.001, 0.001, 0.001, 0.001, 0.001, 0.001)$ ,  $\sigma = (1.00, 1.00, 1.00, 1.00)$ . The blue line represents the MCMC moving average whereas the red one represents the true values.

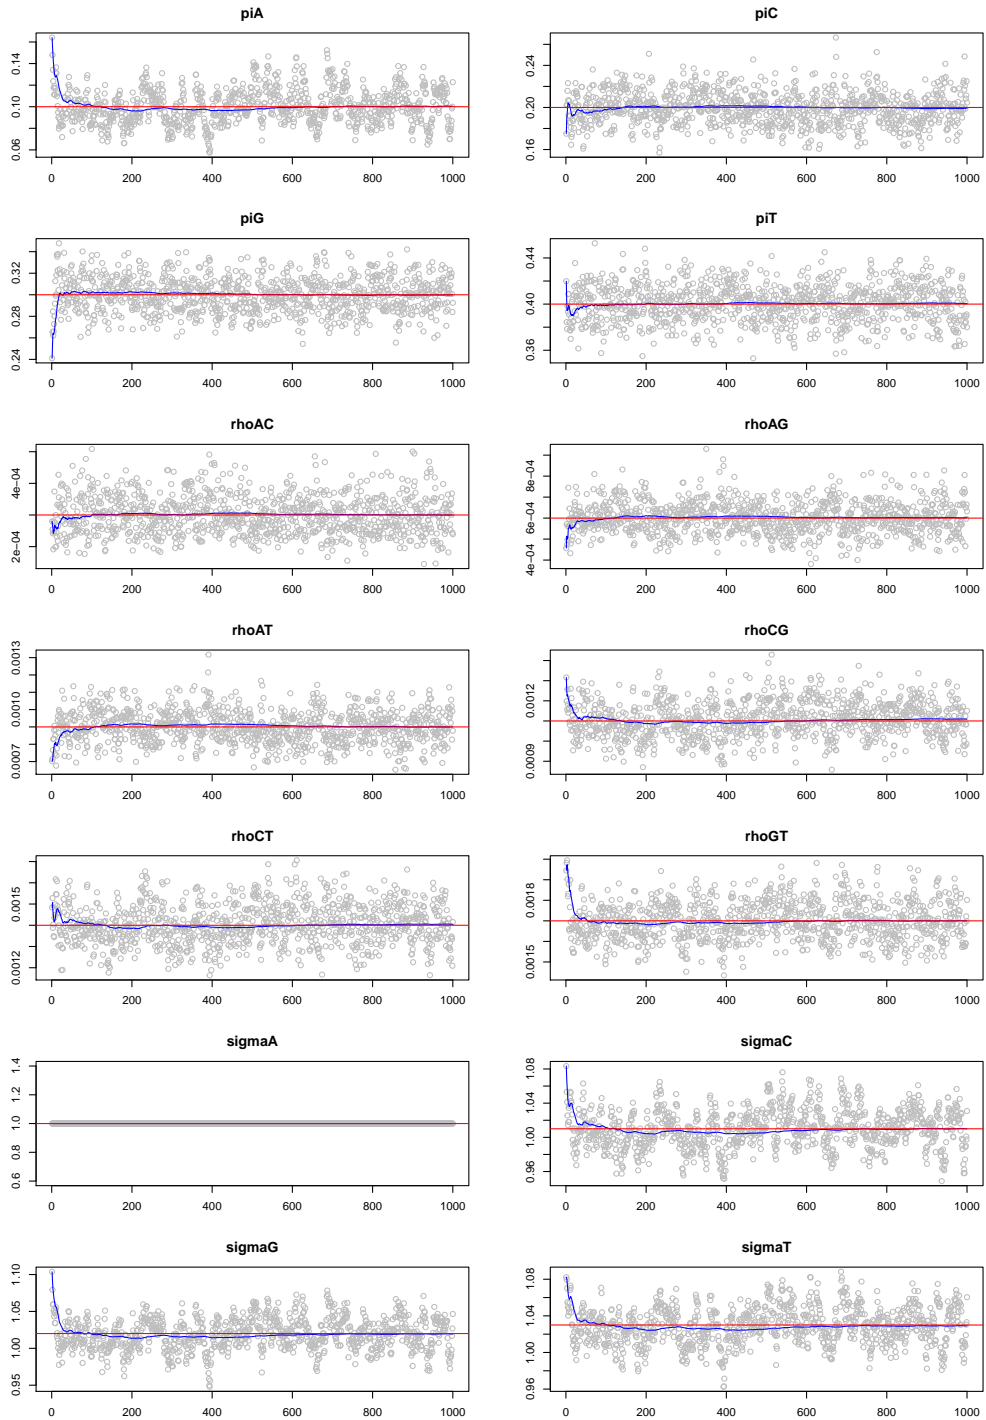

Figure S5: **Validation of the Bayesian algorithms.** Simulation conditions: 1000000 sites, 10 individuals and a complex parameter vector for the Moran model with allelic selection:  $\pi = (0.10, 0.20, 0.30, 0.40)$ ,  $\rho = (0.003, 0.006, 0.009, 0.011, 0.014, 0.017)$ ,  $\sigma = (1.00, 1.01, 1.02, 1.03)$ . The blue line represents the MCMC moving average whereas the red one represents the true values.

Figure S6: **Prediction of the site-frequency spectrum in great ape populations.** The gray points represent the observed counts and the vertical lines the posterior predictive distribution of the stationary distribution under the 4-variate Moran model: boundary mutation model (blue) and allelic selection model (red).

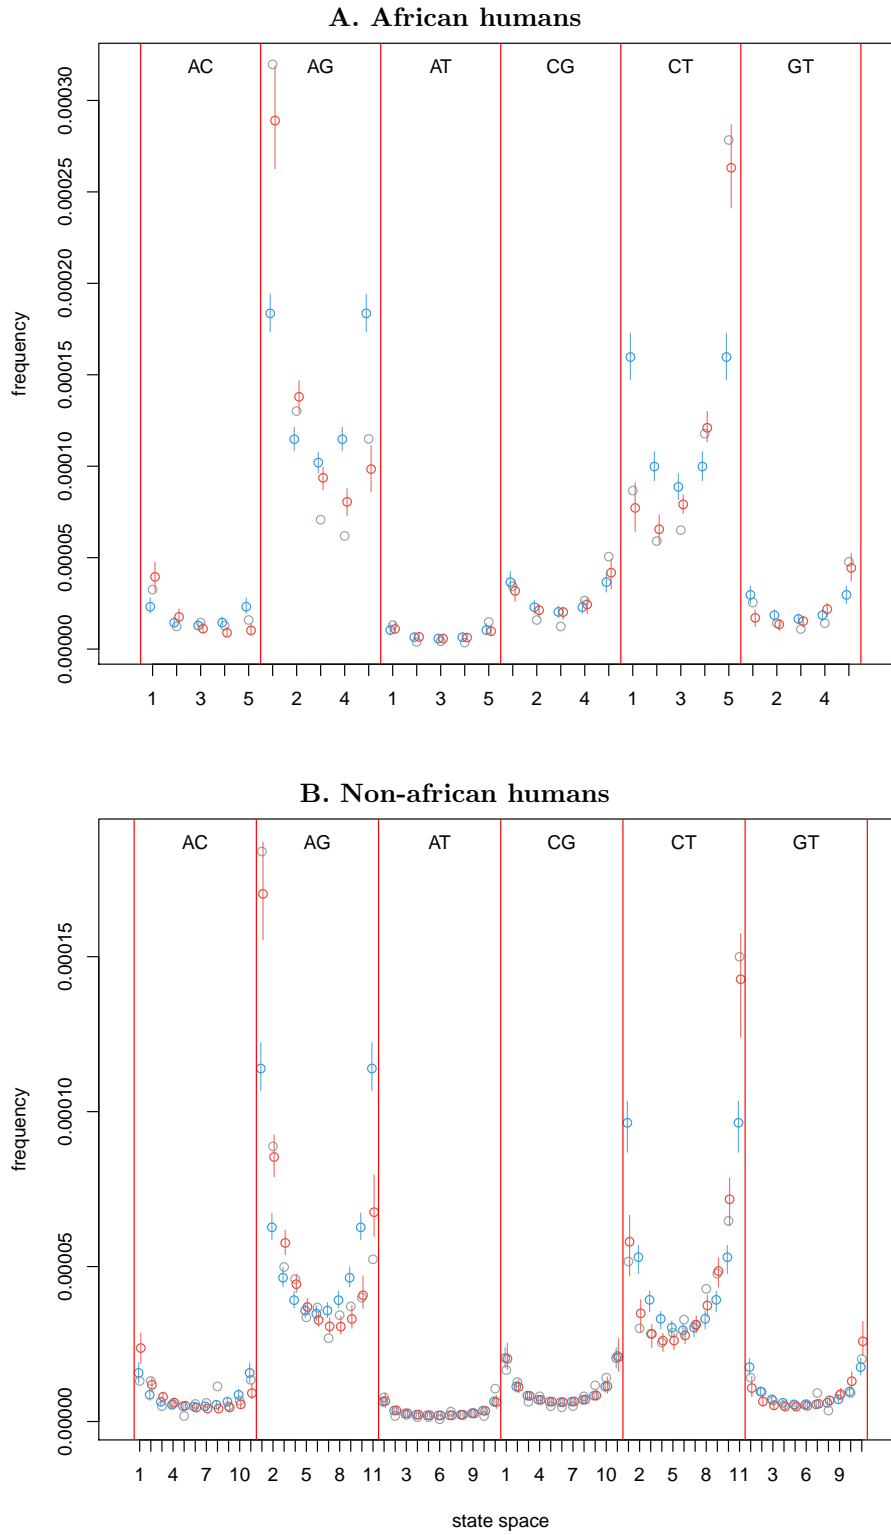

### C. Eastern gorillas

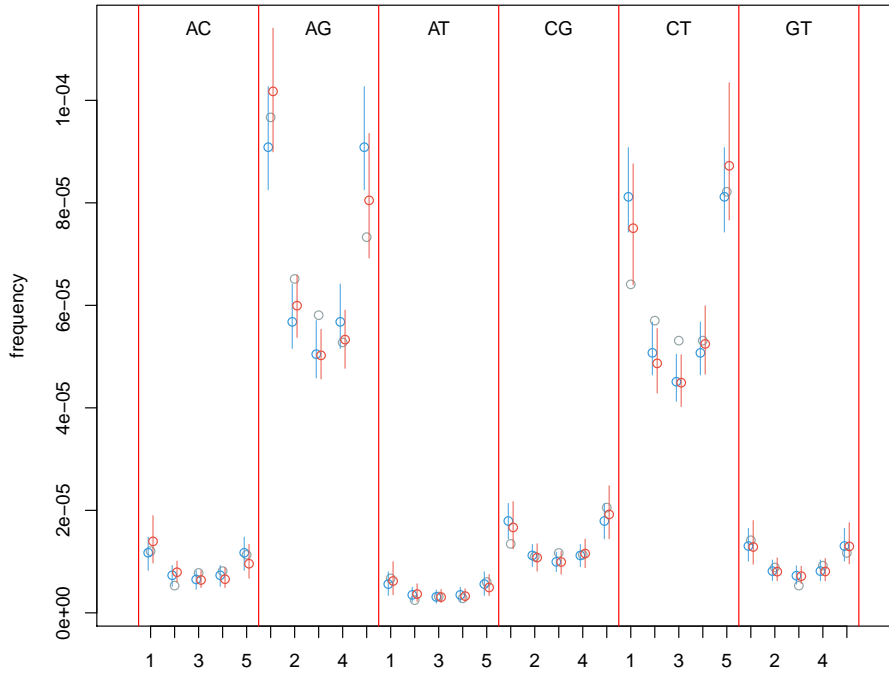

### D. Western gorilla

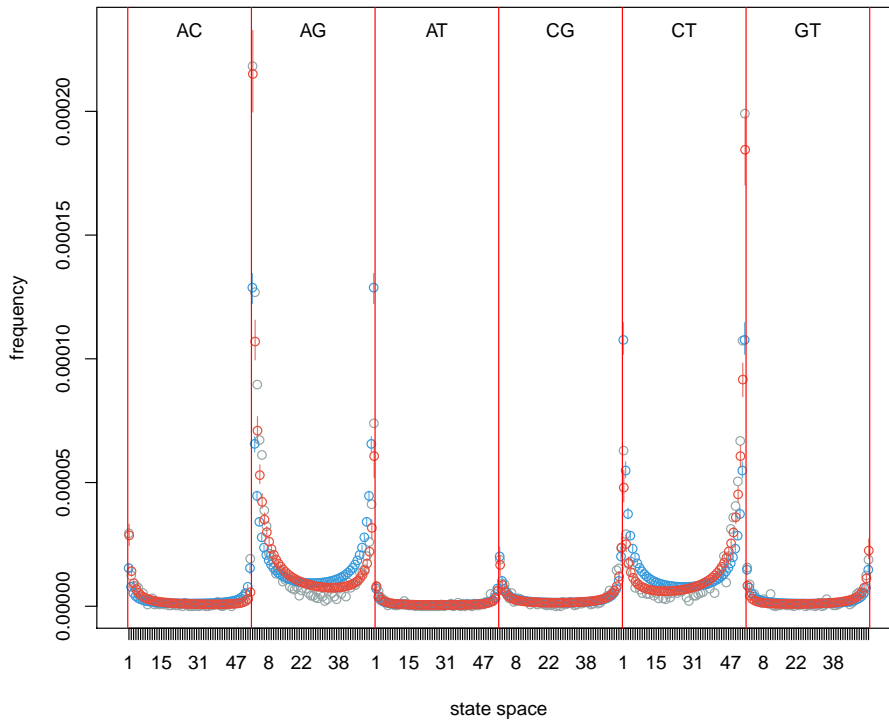

### E. Western chimpanzees

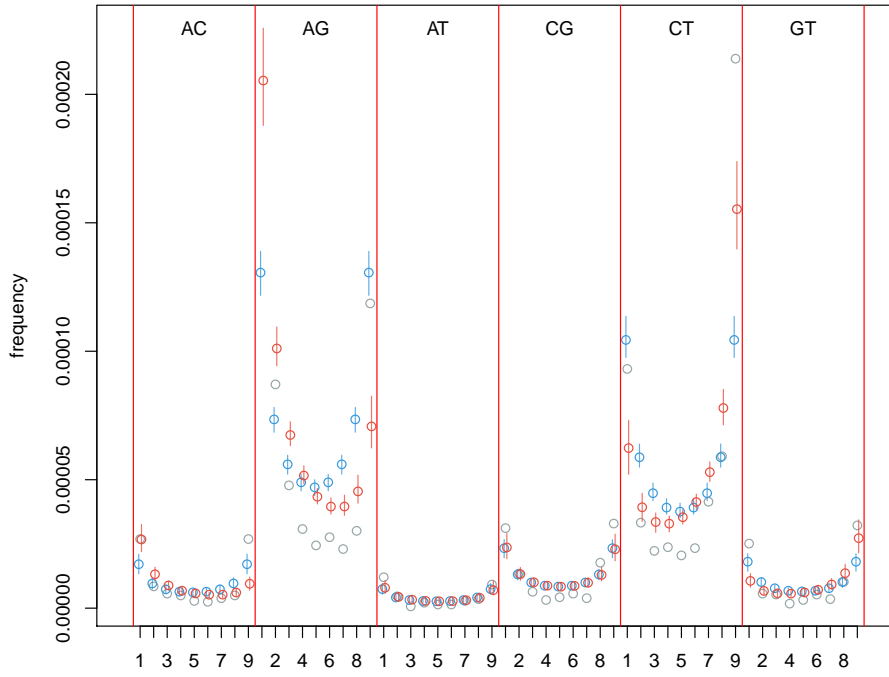

### F. Nigeria-Cameroon chimpanzees

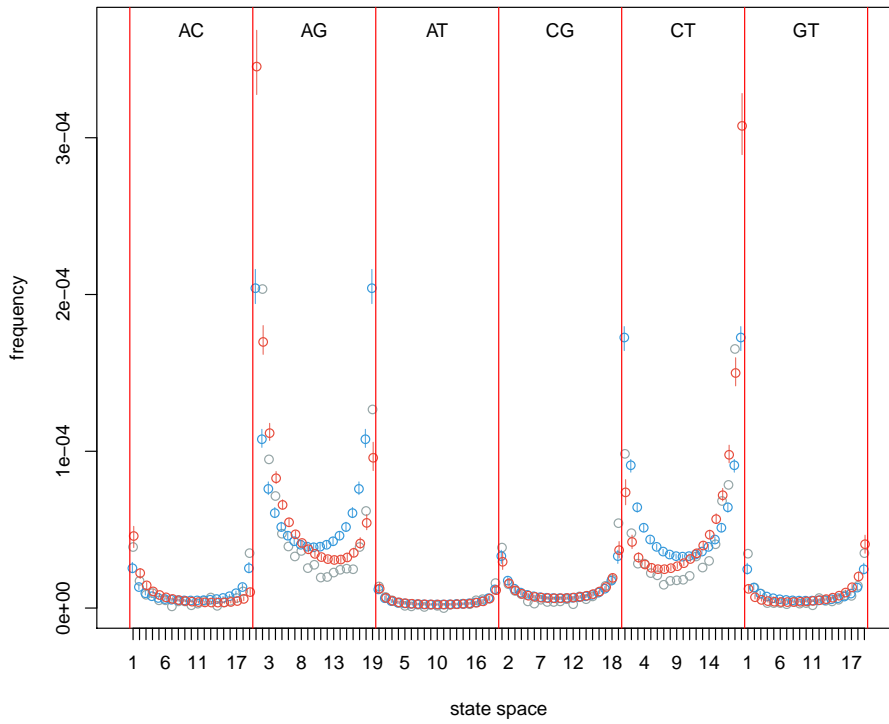

### G. Eastern chimpanzees

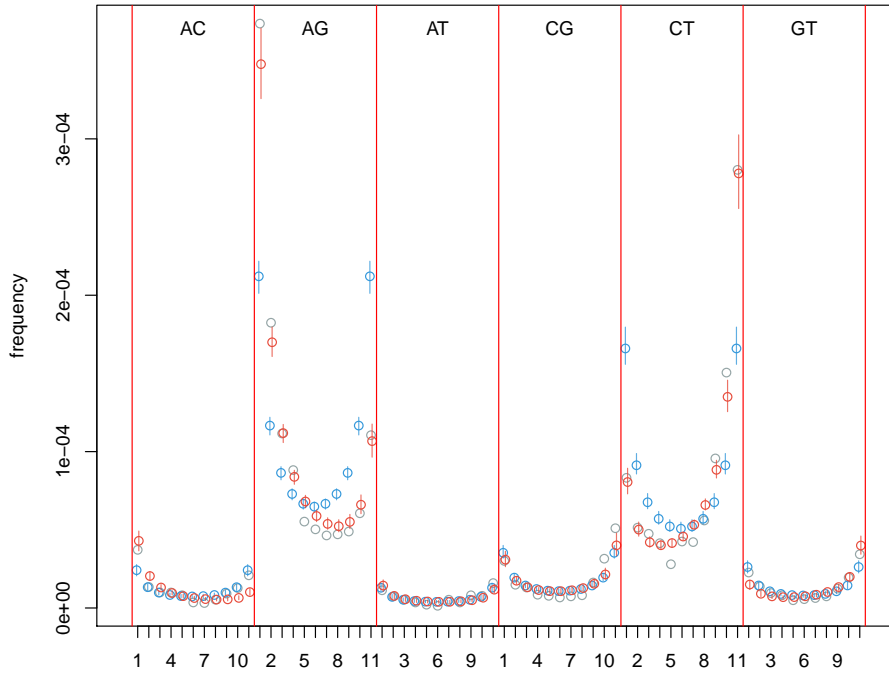

### H. Central chimpanzees

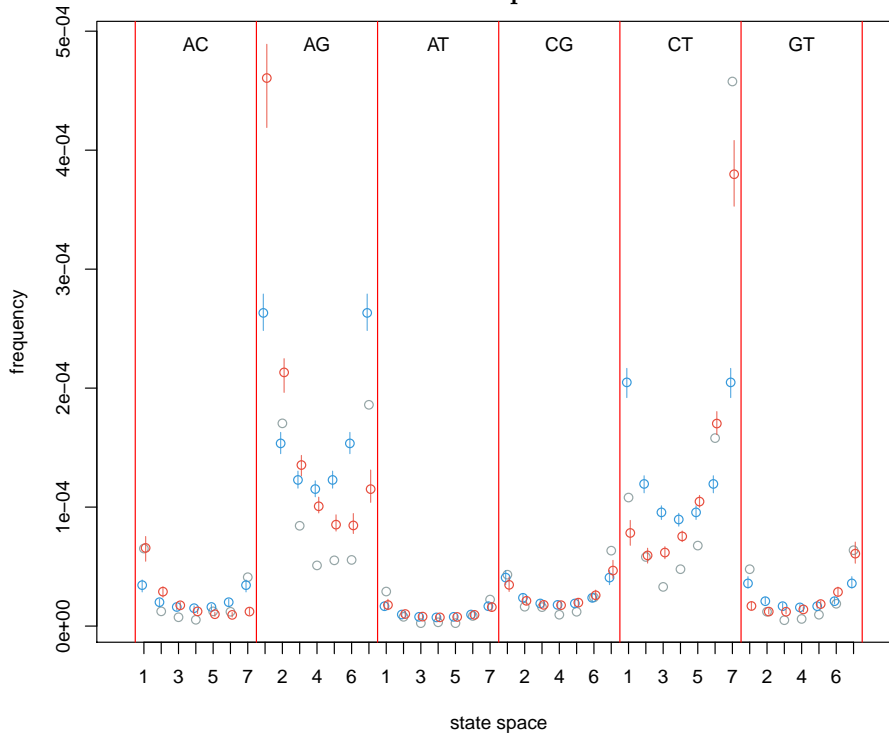

### I. Bonobos

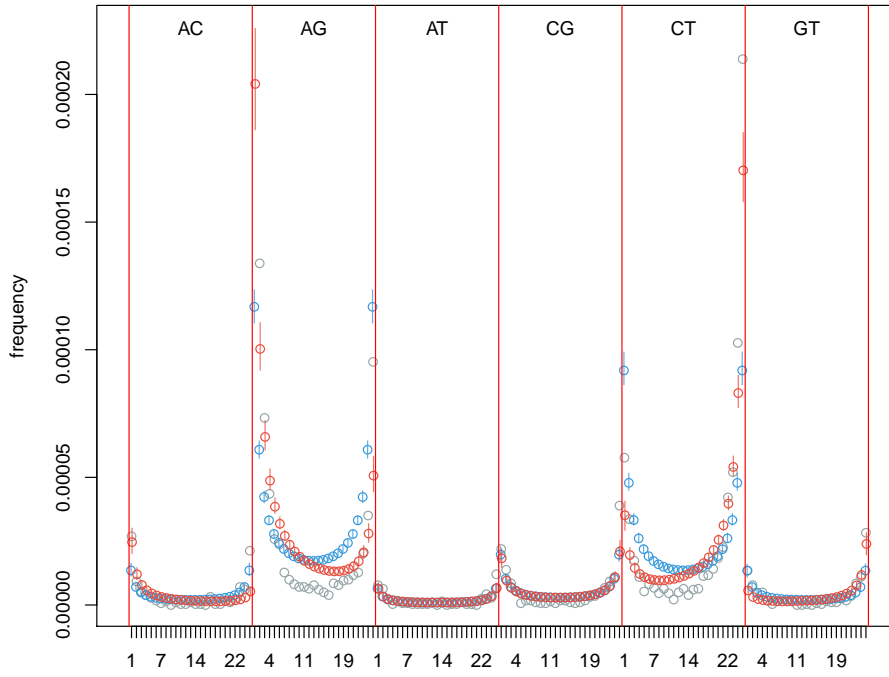

### J. Bornean orangutans

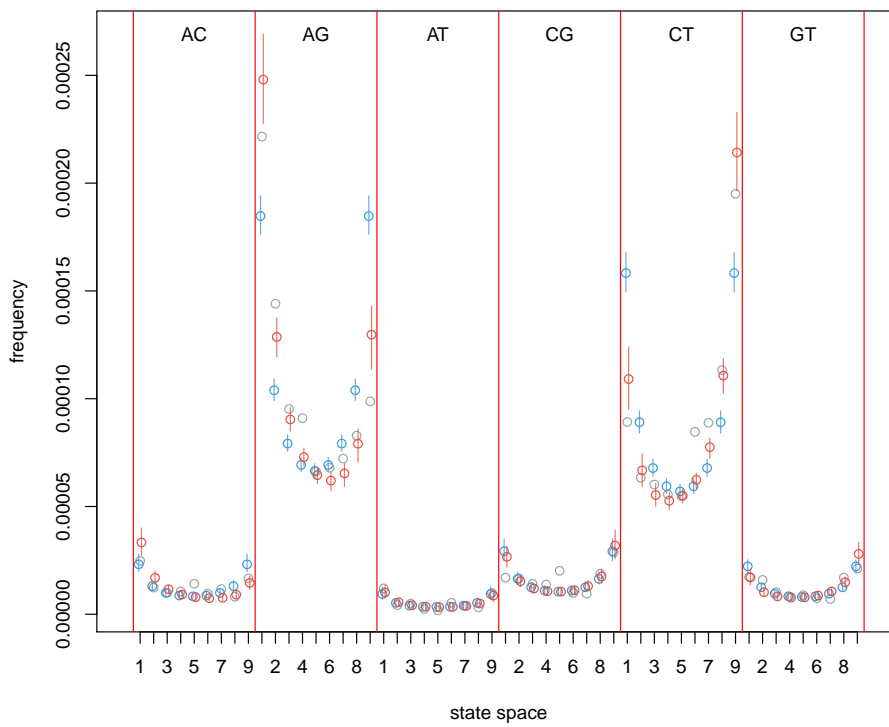

### K. Sumatran orangutans

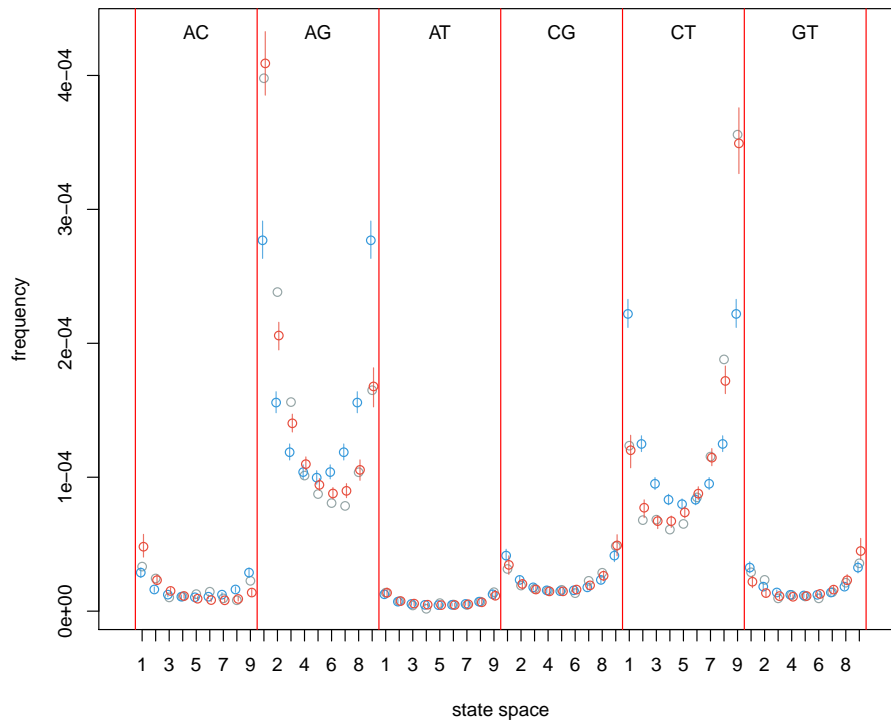



**A.  $\sigma$  versus recombination rate**

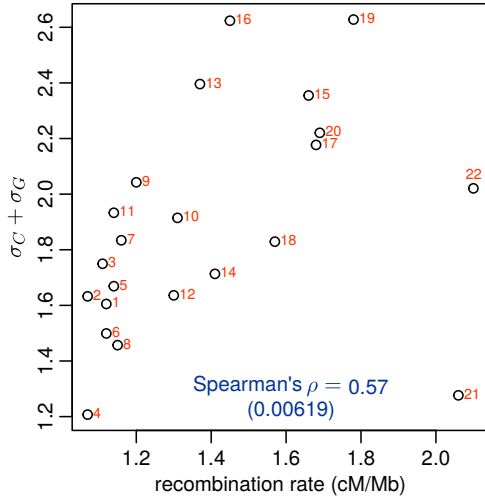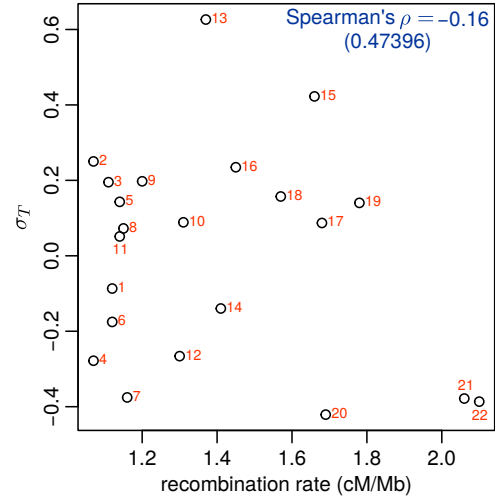

**B.  $\sigma$  versus chromosome length**

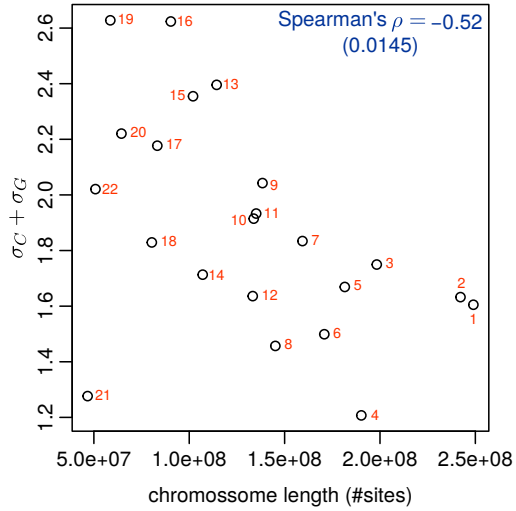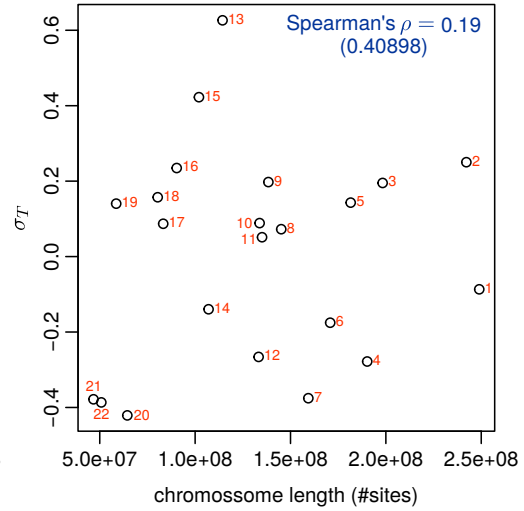

Figure S7: **GC-bias vs. recombination rate and chromosome length in non-African humans.** The scaled selection coefficients were estimated based on the posterior average. Recombination rates were estimated by comparing the genetic distance (cM) between markers to the physical (Mb) as described in (Jensen-Seaman (2004)) and based on the human Iceland pedigree map.

| Scheme | $\pi_A$ | $\pi_C$ | $\pi_G$ | $\pi_T$ | $\rho_{AC}$ | $\rho_{AG}$ | $\rho_{AT}$ | $\rho_{CG}$ | $\rho_{CT}$ | $\rho_{GT}$ | $\sigma_A$ | $\sigma_C$ | $\sigma_G$ | $\sigma_T$ |
|--------|---------|---------|---------|---------|-------------|-------------|-------------|-------------|-------------|-------------|------------|------------|------------|------------|
| M1     | 0.25    | 0.25    | 0.25    | 0.25    | 0.001       | 0.001       | 0.001       | 0.001       | 0.001       | 0.001       | -          | -          | -          | -          |
| M2     | 0.22    | 0.30    | 0.23    | 0.25    | 0.00028     | 0.00300     | 0.00016     | 0.00036     | 0.00172     | 0.00033     | -          | -          | -          | -          |
| S1     | 0.25    | 0.25    | 0.25    | 0.25    | 0.001       | 0.001       | 0.001       | 0.001       | 0.001       | 0.001       | 1          | 1          | 1          | 1          |
| S2     | 0.22    | 0.30    | 0.23    | 0.25    | 0.00028     | 0.00300     | 0.00016     | 0.00036     | 0.00172     | 0.00033     | 1          | 1.030      | 1.024      | 1.004      |

Table S1: **Simulation schemes.** Simulation schemes used to validate the Bayesian algorithms for estimating the model parameters under the multivariate Moran model with mutation (M schemes) and mutation plus selection (S schemes).  $\sigma_A$  is set to 1.

| Population                   | $\mu_{AC}$ | $\mu_{CA}$ | $\mu_{AG}$ | $\mu_{GA}$ |
|------------------------------|------------|------------|------------|------------|
| African humans               | 0.000237   | 0.000934   | 0.002248   | 0.008030   |
| Non-african humans           | 0.000464   | 0.000957   | 0.003411   | 0.008700   |
| Eastern gorillas             | 0.000220   | 0.000257   | 0.001850   | 0.002280   |
| Western gorillas             | 0.001383   | 0.005259   | 0.014739   | 0.049773   |
| Bonobos                      | 0.000617   | 0.002196   | 0.005840   | 0.022977   |
| Nigeria-Cameroon chimpanzees | 0.000896   | 0.003185   | 0.008399   | 0.029962   |
| Eastern chimpanzees          | 0.000516   | 0.001829   | 0.005393   | 0.018297   |
| Central chimpanzees          | 0.000391   | 0.002039   | 0.003698   | 0.017267   |
| Western chimpanzees          | 0.000391   | 0.000913   | 0.002932   | 0.008944   |
| Sumatran orangutans          | 0.000573   | 0.001699   | 0.006940   | 0.017486   |
| Bornean orangutans           | 0.000604   | 0.001116   | 0.005353   | 0.010287   |

  

| Population                   | $\mu_{AT}$ | $\mu_{TA}$ | $\mu_{CG}$ | $\mu_{GC}$ |
|------------------------------|------------|------------|------------|------------|
| African humans               | 0.000224   | 0.000233   | 0.000982   | 0.000888   |
| Non-african humans           | 0.000318   | 0.000296   | 0.000838   | 0.001036   |
| Eastern gorillas             | 0.000114   | 0.000134   | 0.000352   | 0.000373   |
| Western gorillas             | 0.001508   | 0.001765   | 0.004350   | 0.003859   |
| Bonobos                      | 0.000761   | 0.000639   | 0.001869   | 0.002065   |
| Nigeria-Cameroon chimpanzees | 0.000998   | 0.000964   | 0.002558   | 0.002566   |
| Eastern chimpanzees          | 0.000594   | 0.000655   | 0.001700   | 0.001626   |
| Central chimpanzees          | 0.000511   | 0.000514   | 0.001457   | 0.001304   |
| Western chimpanzees          | 0.000289   | 0.000293   | 0.000788   | 0.001028   |
| Sumatran orangutans          | 0.000475   | 0.000515   | 0.001739   | 0.001477   |
| Bornean orangutans           | 0.000359   | 0.000378   | 0.001065   | 0.001108   |

  

| Population                   | $\mu_{CT}$ | $\mu_{TC}$ | $\mu_{GT}$ | $\mu_{TG}$ |
|------------------------------|------------|------------|------------|------------|
| African humans               | 0.006177   | 0.001625   | 0.001235   | 0.000360   |
| Non-african humans           | 0.005777   | 0.002607   | 0.001324   | 0.000484   |
| Eastern gorillas             | 0.001609   | 0.001619   | 0.000291   | 0.000277   |
| Western gorillas             | 0.033763   | 0.010382   | 0.005220   | 0.001810   |
| Bonobos                      | 0.015136   | 0.003569   | 0.002698   | 0.000576   |
| Nigeria-Cameroon chimpanzees | 0.021183   | 0.005752   | 0.003521   | 0.000954   |
| Eastern chimpanzees          | 0.011799   | 0.003667   | 0.002102   | 0.000683   |
| Central chimpanzees          | 0.011798   | 0.002272   | 0.002279   | 0.000491   |
| Western chimpanzees          | 0.005329   | 0.002309   | 0.001194   | 0.000397   |
| Sumatran orangutans          | 0.012329   | 0.004508   | 0.001913   | 0.000825   |
| Bornean orangutans           | 0.007159   | 0.004084   | 0.001160   | 0.000636   |

  

| Population                   | $\sigma_C$ | $\sigma_G$ | $\sigma_T$ |
|------------------------------|------------|------------|------------|
| African humans               | 2.415      | 1.864      | 0.193      |
| Non-african humans           | 1.192      | 1.161      | 0.053      |
| Eastern gorillas             | 0.592      | 0.357      | 0.346      |
| Western gorillas             | 1.711      | 1.334      | 0.285      |
| Bonobos                      | 1.705      | 1.551      | -0.057     |
| Nigeria-Cameroon chimpanzees | 1.741      | 1.473      | 0.091      |
| Eastern chimpanzees          | 1.858      | 1.506      | 0.241      |
| Central chimpanzees          | 2.600      | 2.083      | 0.145      |
| Western chimpanzees          | 1.385      | 1.420      | 0.150      |
| Sumatran orangutans          | 1.687      | 1.176      | 0.228      |
| Bornean orangutans           | 1.087      | 0.846      | 0.194      |

Table S2: **Great apes mutation rates and selection coefficients.** Scaled mutation rates and selection coefficients estimated for the great apes populations using the multivariate Moran model with boundary mutations and allelic selection.
